# Supplementary material
Source: MDPI journal article supplement (https://www.mdpi.com/2075-163X/12/7/910)
Supplement: s1 [file s1]

**Supplementary Table S2. Zircon trace element concentrations for the early Neoproterozoic granitic rocks in the western margin of the NQT**

| Spot       | La   | Ce   | Pr   | Nd   | Sm   | Eu   | Gd   | Tb   | Dy   | Ho   | Er   | Tm   | Yb  | Lu   | Th   | U   | Th/U | (La/Yb) <sub>N</sub> | Eu/Eu* | Ce/Ce* | Ti   | T <sub>TI</sub> (°C) |
|------------|------|------|------|------|------|------|------|------|------|------|------|------|-----|------|------|-----|------|----------------------|--------|--------|------|----------------------|
| WS20-01-07 | 0.01 | 3.60 | 0.07 | 1.14 | 3.11 | 0.07 | 24.7 | 10.2 | 140  | 55.2 | 256  | 55.3 | 493 | 94.1 | 155  | 429 | 0.4  | 0.000008             | 0.02   | 44.2   | 4.27 | 741                  |
| WS20-01-08 | 0.01 | 1.29 | 0.11 | 2.02 | 5.54 | 0.25 | 34.5 | 11.8 | 131  | 46.4 | 189  | 36.9 | 312 | 56.7 | 82.2 | 310 | 0.3  | 0.000024             | 0.05   | 8.82   | 8.34 | 795                  |
| WS20-01-09 | 0.20 | 1.83 | 0.14 | 1.28 | 2.35 | 0.07 | 21.4 | 9.81 | 143  | 63.0 | 302  | 67.2 | 623 | 121  | 78.8 | 420 | 0.2  | 0.000222             | 0.03   | 2.64   | 7.39 | 785                  |
| WS20-01-10 | 0.01 | 3.27 | 0.07 | 1.62 | 4.85 | 0.09 | 35.7 | 13.5 | 178  | 71.5 | 323  | 68.0 | 600 | 112  | 168  | 401 | 0.4  | 0.000013             | 0.02   | 28.0   |      |                      |
| WS20-01-11 | 0.00 | 2.18 | 0.08 | 1.41 | 4.30 | 0.07 | 30.8 | 11.4 | 152  | 61.4 | 279  | 58.4 | 528 | 101  | 154  | 394 | 0.4  |                      | 0.02   |        | 11.1 | 820                  |
| WS20-01-12 | 0.46 | 6.07 | 0.31 | 2.20 | 3.91 | 0.45 | 21.9 | 6.68 | 70.1 | 22.8 | 90.6 | 18.1 | 160 | 29.6 | 107  | 366 | 0.3  | 0.001937             | 0.15   | 3.91   | 11.2 | 821                  |
| WS20-01-13 | 0.01 | 3.74 | 0.10 | 1.73 | 4.33 | 0.21 | 30.7 | 10.5 | 140  | 54.5 | 245  | 52.0 | 454 | 85.8 | 210  | 401 | 0.5  | 0.000017             | 0.06   | 26.7   | 13.4 | 838                  |
| WS20-01-14 | 0.49 | 21.7 | 0.30 | 3.61 | 6.18 | 1.02 | 26.0 | 7.71 | 78.1 | 26.4 | 107  | 21.3 | 183 | 35.2 | 170  | 265 | 0.6  | 0.001818             | 0.25   | 13.7   |      |                      |
| WS20-01-15 | 0.22 | 3.81 | 0.19 | 2.89 | 6.36 | 0.15 | 42.0 | 16.8 | 213  | 82.5 | 373  | 76.9 | 677 | 128  | 253  | 582 | 0.4  | 0.000225             | 0.03   | 4.47   | 4.83 | 751                  |
| WS20-01-16 | 0.01 | 2.47 | 0.05 | 1.86 | 5.05 | 0.07 | 36.1 | 13.3 | 178  | 70.1 | 317  | 67.7 | 601 | 115  | 182  | 505 | 0.4  | 0.000013             | 0.02   | 25.8   | 7.10 | 782                  |
| WS20-01-17 | 4.61 | 10.6 | 1.28 | 6.12 | 4.36 | 0.11 | 33.2 | 15.8 | 233  | 96.2 | 461  | 101  | 939 | 180  | 74.4 | 646 | 0.1  | 0.003330             | 0.03   | 1.06   | 4.85 | 751                  |
| WS20-01-18 | 0.17 | 2.86 | 0.13 | 1.53 | 4.04 | 0.12 | 28.0 | 10.7 | 142  | 58.4 | 257  | 54.1 | 501 | 97.0 | 136  | 399 | 0.3  | 0.000233             | 0.03   | 4.64   | 5.58 | 762                  |
| WS20-01-19 | 0.01 | 3.56 | 0.08 | 1.28 | 4.29 | 0.03 | 32.7 | 13.1 | 169  | 67.5 | 302  | 61.5 | 543 | 105  | 178  | 411 | 0.4  | 0.000014             | 0.01   | 28.5   | 9.30 | 804                  |
| WS20-01-20 | 0.01 | 3.63 | 0.08 | 1.60 | 4.60 | 0.08 | 33.5 | 13.0 | 176  | 71.4 | 323  | 67.2 | 602 | 113  | 188  | 465 | 0.4  | 0.000013             |        | 28.3   | 12.9 | 834                  |
| WS20-01-21 | 0.01 | 3.50 | 0.09 | 1.76 | 5.49 | 0.08 | 35.8 | 14.0 | 181  | 71.3 | 322  | 66.4 | 598 | 112  | 197  | 448 | 0.4  | 0.000013             | 0.02   | 26.6   | 4.93 | 752                  |
| WS20-01-22 | 0.03 | 3.21 | 0.12 | 3.08 | 7.68 | 0.16 | 55.7 | 20.7 | 258  | 99.5 | 449  | 89.2 | 791 | 145  | 192  | 424 | 0.5  | 0.000024             | 0.02   | 13.6   | 10.3 | 813                  |
| WS20-01-23 | 0.00 | 1.84 | 0.05 | 0.91 | 3.44 | 0.07 | 23.8 | 9.70 | 129  | 53.1 | 251  | 53.1 | 483 | 94.2 | 116  | 330 | 0.4  |                      | 0.02   |        | 7.75 | 789                  |
| WS20-01-24 | 0.01 | 3.69 | 0.08 | 1.38 | 4.16 | 0.11 | 31.8 | 12.3 | 162  | 63.1 | 289  | 59.0 | 537 | 103  | 182  | 450 | 0.4  | 0.000007             | 0.03   | 40.7   | 7.22 | 783                  |
| WS20-02-07 | 0.03 | 8.46 | 0.06 | 1.12 | 2.14 | 0.27 | 15.4 | 5.93 | 75.7 | 30.0 | 133  | 28.3 | 264 | 50.0 | 81.5 | 176 | 0.5  | 0.000071             | 0.14   | 51.0   | 9.08 | 802                  |
| WS20-02-08 | 0.01 | 10.1 | 0.08 | 1.92 | 4.18 | 0.31 | 21.1 | 6.08 | 66.6 | 22.2 | 97.3 | 20.4 | 200 | 39.7 | 95.1 | 221 | 0.4  | 0.000019             | 0.10   | 117    | 20.9 | 880                  |
| WS20-02-09 | 0.23 | 2.25 | 0.26 | 3.68 | 9.11 | 0.54 | 45.1 | 13.0 | 119  | 35.4 | 123  | 21.5 | 180 | 30.8 | 114  | 317 | 0.4  | 0.000858             | 0.08   | 2.24   |      |                      |
| WS20-02-10 | 0.15 | 2.34 | 0.17 | 1.82 | 3.76 | 0.23 | 24.1 | 9.54 | 126  | 52.0 | 241  | 52.7 | 505 | 98.8 | 86.0 | 248 | 0.3  | 0.000197             | 0.07   | 3.56   |      |                      |
| WS20-02-11 | 2.88 | 11.4 | 1.39 | 8.58 | 6.17 | 0.07 | 28.6 | 10.5 | 136  | 55.2 | 252  | 53.2 | 484 | 92.7 | 162  | 470 | 0.3  | 0.004049             | 0.02   | 1.38   | 5.14 | 756                  |
| WS20-02-12 | 7.02 | 17.4 | 2.08 | 10.9 | 7.19 | 0.42 | 30.7 | 9.0  | 78.2 | 22.5 | 85.2 | 16.7 | 153 | 28.1 | 81.0 | 379 | 0.2  | 0.031126             | 0.09   | 1.10   | 13.7 | 839                  |
| WS20-02-13 | 0.25 | 15.9 | 0.37 | 4.86 | 7.80 | 1.86 | 46.7 | 16.4 | 200  | 74.1 | 325  | 69.7 | 650 | 126  | 240  | 499 | 0.5  | 0.000256             | 0.30   | 12.7   | 2.43 | 700                  |
| WS20-02-14 | 0.07 | 2.24 | 0.10 | 1.18 | 4.15 | 0.12 | 32.0 | 12.1 | 163  | 65.8 | 297  | 63.4 | 570 | 110  | 142  | 397 | 0.4  | 0.000087             | 0.03   | 6.24   | 7.95 | 791                  |
| WS20-02-15 | 1.73 | 22.1 | 0.98 | 10.0 | 12.0 | 1.37 | 45.6 | 10.9 | 97.0 | 29.5 | 116  | 24.3 | 220 | 42.1 | 400  | 419 | 1.0  | 0.005355             | 0.18   | 4.11   | 12.7 | 832                  |
| WS20-02-16 | 0.01 | 1.34 | 0.07 | 1.58 | 5.44 | 0.22 | 35.9 | 12.9 | 144  | 52.0 | 220  | 44.9 | 406 | 79.8 | 103  | 449 | 0.2  | 0.000009             | 0.05   | 16.4   | 13.3 | 837                  |
| WS20-02-17 | 0.02 | 9.61 | 0.19 | 2.96 | 6.31 | 0.28 | 42.4 | 14.5 | 184  | 72.9 | 329  | 67.5 | 612 | 119  | 221  | 496 | 0.4  | 0.000025             | 0.05   | 35.2   | 9.35 | 805                  |

|            |      |      |      |      |      |      |      |      |      |      |      |      |     |      |      |     |     |          |      |      |      |     |
|------------|------|------|------|------|------|------|------|------|------|------|------|------|-----|------|------|-----|-----|----------|------|------|------|-----|
| WS20-02-18 | 0.71 | 5.07 | 0.36 | 4.13 | 5.68 | 0.40 | 32.0 | 12.6 | 161  | 65.3 | 294  | 60.3 | 546 | 104  | 170  | 424 | 0.4 | 0.000880 | 0.09 | 2.45 | 8.91 | 801 |
| WS20-02-19 | 0.01 | 2.05 | 0.07 | 1.19 | 3.83 | 0.05 | 31.0 | 11.6 | 152  | 63.4 | 291  | 61.0 | 554 | 109  | 150  | 411 | 0.4 | 0.000007 | 0.01 | 25.1 | 9.31 | 805 |
| WS20-02-20 | 0.01 | 2.33 | 0.05 | 1.17 | 3.70 | 0.07 | 24.6 | 11.0 | 141  | 57.2 | 264  | 56.2 | 512 | 99.4 | 140  | 404 | 0.3 | 0.000007 | 0.02 | 34.4 | 8.73 | 799 |
| WS20-02-21 | 0.02 | 3.87 | 0.14 | 2.16 | 5.53 | 0.05 | 36.8 | 14.2 | 185  | 74.2 | 333  | 70.2 | 630 | 119  | 203  | 478 | 0.4 | 0.000018 | 0.01 | 19.3 | 11.2 | 821 |
| WS20-02-22 | 2.44 | 16.9 | 1.33 | 7.85 | 6.72 | 0.37 | 32.8 | 11.6 | 147  | 56.9 | 258  | 53.7 | 484 | 92.9 | 176  | 397 | 0.4 | 0.003424 | 0.08 | 2.28 | 4.53 | 746 |
| WS20-02-23 | 0.54 | 3.97 | 0.37 | 2.94 | 5.18 | 0.06 | 28.9 | 11.7 | 158  | 64.9 | 300  | 64.2 | 588 | 112  | 140  | 424 | 0.3 | 0.000625 | 0.01 | 2.14 | 13.0 | 834 |
| WS20-02-24 | 0.04 | 3.86 | 0.12 | 2.32 | 4.97 | 0.05 | 35.2 | 13.4 | 172  | 70.1 | 316  | 64.6 | 575 | 107  | 247  | 520 | 0.5 | 0.000047 | 0.01 | 13.7 | 5.65 | 763 |
|            |      |      |      |      |      |      |      |      |      |      |      |      |     |      |      |     |     |          |      |      |      |     |
| WS20-03-07 | 0.05 | 2.72 | 0.06 | 1.58 | 4.29 | 0.08 | 25.8 | 10.6 | 142  | 58.2 | 265  | 55.6 | 500 | 97.9 | 158  | 433 | 0.4 | 0.000067 | 0.02 | 12.0 | 6.26 | 771 |
| WS20-03-08 | 0.01 | 2.26 | 0.05 | 1.11 | 4.68 | 0.07 | 33.7 | 12.5 | 160  | 64.0 | 294  | 61.1 | 551 | 107  | 134  | 356 | 0.4 | 0.000007 | 0.02 | 31.2 | 3.96 | 735 |
| WS20-03-09 | 0.31 | 3.13 | 0.24 | 3.28 | 5.31 | 0.25 | 35.1 | 12.8 | 165  | 65.0 | 291  | 62.5 | 582 | 113  | 155  | 430 | 0.4 | 0.000357 | 0.05 | 2.82 |      |     |
| WS20-03-10 | 0.00 | 1.75 | 0.05 | 1.74 | 3.77 | 0.21 | 26.0 | 9.09 | 102  | 35.6 | 149  | 30.3 | 271 | 52.3 | 78.5 | 316 | 0.2 |          | 0.06 |      | 9.95 | 810 |
| WS20-03-11 | 0.05 | 2.20 | 0.06 | 1.04 | 3.40 | 0.04 | 25.2 | 11.2 | 151  | 63.5 | 303  | 65.6 | 611 | 120  | 103  | 371 | 0.3 | 0.000055 | 0.01 | 10.0 | 7.84 | 790 |
| WS20-03-12 | 0.87 | 5.19 | 0.32 | 2.75 | 4.50 | 0.50 | 26.0 | 10.8 | 147  | 60.6 | 282  | 60.9 | 563 | 112  | 113  | 522 | 0.2 | 0.001055 | 0.14 | 2.36 | 3.53 | 727 |
| WS20-03-13 | 0.04 | 3.54 | 0.13 | 1.75 | 3.62 | 0.47 | 21.0 | 8.16 | 100  | 42.7 | 205  | 46.6 | 455 | 96.5 | 115  | 327 | 0.4 | 0.000067 | 0.17 | 11.1 |      |     |
| WS20-03-14 | 0.00 | 2.25 | 0.05 | 1.33 | 4.04 | 0.07 | 24.7 | 9.62 | 130  | 52.1 | 241  | 50.9 | 470 | 90.8 | 133  | 365 | 0.4 |          | 0.02 |      | 22.9 | 889 |
| WS20-03-15 | 0.06 | 1.81 | 0.23 | 3.51 | 8.60 | 0.53 | 47.3 | 12.8 | 109  | 29.6 | 95.0 | 16.2 | 130 | 22.2 | 106  | 330 | 0.3 | 0.000292 | 0.08 | 3.85 | 6.98 | 780 |
| WS20-03-16 | 0.05 | 2.10 | 0.04 | 1.15 | 3.29 | 0.03 | 27.6 | 10.6 | 136  | 55.2 | 261  | 55.2 | 508 | 97.2 | 139  | 380 | 0.4 | 0.000068 | 0.01 | 10.8 | 8.58 | 798 |
| WS20-03-17 | 0.09 | 1.80 | 0.07 | 0.77 | 3.04 | 0.12 | 22.2 | 10.7 | 146  | 61.6 | 300  | 66.1 | 627 | 123  | 96.8 | 448 | 0.2 | 0.000101 | 0.04 | 5.24 |      |     |
| WS20-03-18 | 0.20 | 4.62 | 0.32 | 4.85 | 9.72 | 0.52 | 57.2 | 19.5 | 237  | 92.3 | 410  | 84.3 | 763 | 144  | 259  | 316 | 0.8 | 0.000182 | 0.07 | 4.34 | 7.05 | 781 |
| WS20-03-19 | 2.65 | 7.85 | 0.84 | 4.09 | 3.56 | 0.31 | 18.9 | 5.94 | 63.1 | 19.0 | 77.6 | 15.8 | 140 | 26.1 | 76.5 | 475 | 0.2 | 0.012924 | 0.12 | 1.27 | 23.0 | 890 |
| WS20-03-20 | 0.01 | 2.70 | 0.05 | 1.27 | 3.44 | 0.08 | 31.4 | 12.0 | 160  | 65.3 | 299  | 62.9 | 574 | 110  | 155  | 447 | 0.3 | 0.000013 | 0.02 | 27.0 | 4.49 | 745 |
| WS20-03-21 | 0.02 | 3.53 | 0.06 | 1.45 | 3.92 | 0.07 | 28.2 | 11.1 | 150  | 60.8 | 280  | 59.0 | 531 | 101  | 165  | 442 | 0.4 | 0.000029 | 0.02 | 24.3 | 6.33 | 772 |
| WS20-03-22 | 0.06 | 3.78 | 0.15 | 1.19 | 4.28 | 0.10 | 32.1 | 12.8 | 170  | 69.3 | 314  | 64.8 | 587 | 110  | 193  | 484 | 0.4 | 0.000067 | 0.03 | 9.76 | 5.00 | 753 |
| WS20-03-23 | 0.00 | 2.14 | 0.08 | 1.01 | 3.79 | 0.08 | 28.2 | 10.7 | 151  | 61.0 | 287  | 61.0 | 559 | 106  | 171  | 520 | 0.3 |          | 0.02 |      | 12.5 | 831 |
| WS20-03-24 | 0.01 | 4.08 | 0.09 | 1.75 | 3.55 | 0.06 | 26.9 | 10.5 | 144  | 57.3 | 262  | 54.8 | 502 | 95.0 | 188  | 473 | 0.4 | 0.000015 | 0.02 | 30.4 | 9.58 | 807 |
|            |      |      |      |      |      |      |      |      |      |      |      |      |     |      |      |     |     |          |      |      |      |     |
| XY20-02-07 | 0.00 | 2.17 | 0.07 | 1.36 | 4.06 | 0.08 | 26.2 | 11.3 | 150  | 60.1 | 273  | 57.5 | 522 | 101  | 143  | 408 | 0.3 |          | 0.02 |      | 11.1 | 820 |
| XY20-02-08 | 0.67 | 20.9 | 0.69 | 3.71 | 6.39 | 0.34 | 33.9 | 15.4 | 209  | 82.7 | 383  | 85.3 | 773 | 147  | 165  | 611 | 0.3 | 0.000589 | 0.07 | 7.43 | 10.1 | 812 |
| XY20-02-09 | 0.05 | 2.72 | 0.06 | 1.04 | 3.63 | 0.07 | 24.9 | 10.0 | 137  | 55.2 | 261  | 56.7 | 527 | 104  | 140  | 468 | 0.3 | 0.000065 | 0.02 | 12.5 |      |     |
| XY20-02-10 | 1.44 | 99.6 | 1.81 | 10.0 | 10.4 | 0.72 | 46.5 | 19.3 | 236  | 83.1 | 356  | 76.0 | 663 | 121  | 290  | 648 | 0.4 | 0.001470 | 0.10 | 14.9 |      |     |
| XY20-02-11 | 0.16 | 5.27 | 0.36 | 5.83 | 12.3 | 0.46 | 63.2 | 21.9 | 259  | 94.9 | 403  | 80.3 | 691 | 130  | 215  | 361 | 0.6 | 0.000155 | 0.05 | 5.31 | 12.7 | 833 |

|             |      |      |      |      |      |      |      |      |      |      |      |      |     |      |      |      |     |          |      |      |      |     |
|-------------|------|------|------|------|------|------|------|------|------|------|------|------|-----|------|------|------|-----|----------|------|------|------|-----|
| XY20-02-12  | 4.32 | 121  | 1.6  | 12.1 | 11.9 | 2.77 | 55.2 | 17.9 | 216  | 80.5 | 375  | 84.0 | 810 | 167  | 1262 | 920  | 1.4 | 0.003618 | 0.33 | 11.1 | 13.1 | 835 |
| XY20-02-13  | 0.64 | 15.9 | 1.07 | 12.7 | 17.9 | 0.37 | 93.2 | 33.6 | 408  | 155  | 667  | 134  | ### | 215  | 516  | 837  | 0.6 | 0.000375 | 0.03 | 4.63 | 6.98 | 780 |
| XY20-02-14c | 0.04 | 8.83 | 0.22 | 2.80 | 7.56 | 0.72 | 60.0 | 23.7 | 306  | 122  | 538  | 114  | ### | 196  | 206  | 423  | 0.5 | 0.000027 | 0.10 | 22.7 | 7.11 | 782 |
| XY20-02-15  | 0.02 | 14.2 | 0.04 | 0.70 | 1.44 | 0.43 | 7.31 | 2.22 | 25.8 | 9.7  | 46.0 | 10.3 | 102 | 22.1 | 112  | 148  | 0.8 | 0.000116 | 0.41 | 137  | 23.1 | 890 |
| XY20-02-16c | 0.66 | 18.3 | 0.38 | 3.67 | 5.65 | 0.67 | 33.0 | 10.1 | 116  | 42.8 | 195  | 40.4 | 384 | 75.7 | 118  | 234  | 0.5 | 0.001166 | 0.15 | 8.88 | 13.2 | 836 |
| XY20-02-17c | 0.30 | 31.4 | 0.35 | 2.77 | 5.46 | 0.41 | 28.7 | 11.4 | 147  | 57.0 | 260  | 54.3 | 492 | 95.6 | 156  | 436  | 0.4 | 0.000421 | 0.10 | 23.1 | 10.2 | 813 |
| XY20-02-18  | 2.60 | 186  | 2.70 | 12.8 | 11.6 | 0.91 | 45.0 | 19.1 | 230  | 82.2 | 355  | 74.5 | 671 | 124  | 212  | 484  | 0.4 | 0.002630 | 0.12 | 17.0 | 19.9 | 875 |
| XY20-02-19c | 0.12 | 18.0 | 0.20 | 2.38 | 5.49 | 1.16 | 33.0 | 12.4 | 151  | 59.7 | 263  | 55.0 | 499 | 95.4 | 159  | 342  | 0.5 | 0.000166 | 0.26 | 27.9 | 9.24 | 804 |
| XY20-02-20c | 0.20 | 3.67 | 0.12 | 2.07 | 4.84 | 0.27 | 24.1 | 8.95 | 102  | 35.1 | 149  | 30.9 | 291 | 55.6 | 92.6 | 393  | 0.2 | 0.000459 | 0.08 | 5.72 | 8.48 | 797 |
| XY20-02-21  | 0.05 | 3.90 | 0.07 | 0.85 | 2.75 | 0.07 | 20.7 | 8.15 | 113  | 47.3 | 219  | 47.5 | 441 | 85.7 | 108  | 353  | 0.3 | 0.000070 | 0.03 | 17.1 | 9.89 | 810 |
| XY20-02-22c | 0.16 | 25.1 | 0.34 | 4.12 | 8.77 | 0.74 | 48.0 | 16.1 | 191  | 71.9 | 310  | 64.1 | 582 | 110  | 392  | 431  | 0.9 | 0.000187 | 0.11 | 26.1 | 10.5 | 815 |
| XY20-02-23c | 0.02 | 7.21 | 0.13 | 1.81 | 3.83 | 0.27 | 18.8 | 5.83 | 67.1 | 23.6 | 99.8 | 20.9 | 189 | 37.0 | 27.2 | 52.7 | 0.5 | 0.000056 | 0.10 | 39.4 | 6.65 | 776 |
| XY20-02-24  | 0.30 | 13.8 | 0.25 | 1.94 | 4.02 | 0.21 | 25.0 | 10.1 | 129  | 50.3 | 222  | 46.2 | 422 | 79.3 | 179  | 408  | 0.4 | 0.000487 | 0.06 | 12.1 |      |     |
|             |      |      |      |      |      |      |      |      |      |      |      |      |     |      |      |      |     |          |      |      |      |     |
| XY20-05-07  | 0.50 | 3.92 | 0.41 | 3.43 | 4.25 | 0.44 | 28.4 | 11.4 | 155  | 63.9 | 294  | 65.4 | 607 | 117  | 96.8 | 418  | 0.2 | 0.000560 | 0.12 | 2.10 | 6.16 | 770 |
| XY20-05-08c | 0.11 | 3.02 | 0.03 | 1.03 | 1.57 | 0.26 | 9.11 | 4.20 | 57.0 | 25.5 | 139  | 38.1 | 449 | 97.7 | 33.3 | 517  | 0.1 | 0.000172 | 0.21 | 12.5 | 3.22 | 720 |
| XY20-05-09c | 0.00 | 2.01 | 0.08 | 0.81 | 4.27 | 0.02 | 33.1 | 13.5 | 180  | 72.1 | 338  | 72.9 | 674 | 130  | 144  | 503  | 0.3 |          | 0.01 |      | 38.5 | 945 |
| XY20-05-10  | 1.62 | 17.5 | 1.04 | 9.33 | 13.5 | 1.16 | 61.6 | 17.6 | 163  | 45.9 | 150  | 25.2 | 195 | 32.0 | 164  | 316  | 0.5 | 0.005640 | 0.12 | 3.26 |      |     |
| XY20-05-11c | 1.33 | 6.56 | 0.58 | 4.27 | 5.57 | 0.54 | 29.6 | 11.3 | 148  | 59.6 | 276  | 57.2 | 528 | 101  | 158  | 433  | 0.4 | 0.001706 | 0.13 | 1.81 |      |     |
| XY20-05-12c | 0.01 | 4.42 | 0.05 | 1.38 | 2.99 | 0.33 | 22.9 | 9.30 | 120  | 48.5 | 224  | 47.5 | 443 | 85.1 | 110  | 294  | 0.4 | 0.000016 | 0.12 | 48.1 | 2.04 | 688 |
| XY20-05-14c | 1.34 | 30.0 | 1.43 | 8.00 | 9.15 | 1.52 | 39.4 | 17.3 | 233  | 88.6 | 408  | 86.3 | 773 | 147  | 247  | 615  | 0.4 | 0.001176 | 0.24 | 5.25 | 15.2 | 849 |
| XY20-05-15  | 0.11 | 2.92 | 0.20 | 2.47 | 4.70 | 0.27 | 29.0 | 10.6 | 141  | 56.0 | 250  | 51.8 | 479 | 88.8 | 154  | 378  | 0.4 | 0.000162 | 0.07 | 4.64 |      |     |
| XY20-05-16  | 0.03 | 2.90 | 0.00 | 1.86 | 4.42 | 0.11 | 32.9 | 13.8 | 177  | 69.7 | 316  | 66.3 | 592 | 114  | 157  | 440  | 0.4 | 0.000037 | 0.03 |      | 6.13 | 770 |
| XY20-05-18c | 0.21 | 12.8 | 0.03 | 0.80 | 2.07 | 0.19 | 10.0 | 4.07 | 55.2 | 22.8 | 108  | 25.5 | 251 | 50.4 | 60.2 | 173  | 0.3 | 0.000573 | 0.13 | 37.6 | 17.9 | 865 |
| XY20-05-19c | 0.12 | 5.98 | 0.01 | 0.94 | 1.86 | 0.23 | 15.3 | 7.13 | 102  | 40.2 | 193  | 44.4 | 442 | 86.7 | 85.6 | 404  | 0.2 | 0.000185 | 0.13 | 36.2 | 10.3 | 814 |
| XY20-05-20  | 0.16 | 6.05 | 0.16 | 1.57 | 4.09 | 0.21 | 26.9 | 11.3 | 149  | 62.0 | 290  | 63.5 | 584 | 110  | 146  | 495  | 0.3 | 0.000188 | 0.06 | 9.07 | 13.7 | 839 |
| XY20-05-21  | 1.36 | 6.13 | 0.71 | 4.99 | 6.53 | 0.81 | 36.5 | 10.5 | 109  | 35.0 | 150  | 31.0 | 291 | 56.4 | 71.3 | 386  | 0.2 | 0.003180 | 0.16 | 1.51 | 9.48 | 806 |
| XY20-05-22  | 0.02 | 1.75 | 0.08 | 1.20 | 2.96 | 0.09 | 25.2 | 10.4 | 141  | 59.5 | 283  | 60.8 | 570 | 109  | 108  | 366  | 0.3 | 0.000023 | 0.03 | 10.6 | 3.41 | 724 |
| XY20-05-23c | 0.61 | 12.0 | 0.46 | 3.38 | 5.85 | 0.52 | 33.5 | 12.9 | 167  | 66.9 | 317  | 67.7 | 626 | 119  | 185  | 443  | 0.4 | 0.000660 | 0.11 | 5.49 | 7.92 | 791 |
| XY20-05-24  | 0.05 | 3.09 | 0.10 | 1.69 | 3.99 | 0.12 | 34.3 | 14.0 | 186  | 75.4 | 351  | 74.5 | 672 | 126  | 181  | 493  | 0.4 | 0.000050 | 0.03 | 10.8 |      |     |

|             |      |      |      |      |      |      |      |      |      |      |      |      |      |      |      |     |     |          |      |      |      |     |
|-------------|------|------|------|------|------|------|------|------|------|------|------|------|------|------|------|-----|-----|----------|------|------|------|-----|
| XY20-07-07  | 0.96 | 18.7 | 1.55 | 10.2 | 19.2 | 0.61 | 61.5 | 21.0 | 207  | 63.0 | 258  | 51.7 | 450  | 83.4 | 90.5 | 364 | 0.2 | 0.001455 | 0.05 | 3.70 | 11.1 | 820 |
| XY20-07-08  | 0.06 | 1.59 | 0.10 | 1.35 | 4.81 | 0.09 | 31.7 | 11.9 | 149  | 58.8 | 269  | 56.6 | 512  | 98.1 | 77.1 | 403 | 0.2 | 0.000080 | 0.02 | 4.92 | 14.7 | 846 |
| XY20-07-09  | 2.88 | 18.6 | 2.38 | 18.2 | 7.50 | 0.18 | 29.2 | 12.2 | 143  | 48.4 | 204  | 40.9 | 356  | 66.6 | 64.4 | 477 | 0.1 | 0.005497 | 0.04 | 1.72 | 9.07 | 802 |
| XY20-07-10  | 0.00 | 1.00 | 0.10 | 2.09 | 6.10 | 0.17 | 47.2 | 20.3 | 269  | 109  | 501  | 105  | 953  | 180  | 79.3 | 298 | 0.3 | 0.000000 | 0.03 |      | 2.90 | 712 |
| XY20-07-11  | 0.03 | 15.3 | 0.13 | 2.18 | 4.55 | 1.05 | 26.3 | 9.88 | 123  | 47.3 | 214  | 45.9 | 433  | 84.1 | 96.2 | 300 | 0.3 | 0.000052 | 0.29 | 56.8 |      |     |
| XY20-07-13  | 5.63 | 30.4 | 2.12 | 12.0 | 12.2 | 0.40 | 58.4 | 24.6 | 300  | 112  | 505  | 105  | 942  | 173  | 123  | 499 | 0.2 | 0.004058 | 0.05 | 2.13 | 2.90 | 712 |
| XY20-07-14c | 0.03 | 3.10 | 0.12 | 2.72 | 7.13 | 0.23 | 37.7 | 12.8 | 152  | 58.8 | 250  | 48.4 | 435  | 81.1 | 118  | 184 | 0.6 | 0.000054 | 0.04 | 11.5 |      |     |
| XY20-07-15  | 0.10 | 3.67 | 0.22 | 2.42 | 5.48 | 0.15 | 38.9 | 16.3 | 218  | 87.5 | 405  | 84.2 | 767  | 145  | 111  | 348 | 0.3 | 0.000089 | 0.03 | 6.02 | 11.4 | 822 |
| XY20-07-16  | 0.18 | 3.39 | 0.18 | 2.86 | 6.75 | 0.07 | 46.6 | 18.2 | 230  | 90.2 | 412  | 85.1 | 755  | 144  | 140  | 363 | 0.4 | 0.000166 | 0.01 | 4.46 | 17.5 | 863 |
| XY20-07-17  | 1.23 | 43.4 | 1.37 | 10.7 | 17.7 | 0.64 | 68.8 | 26.7 | 304  | 108  | 476  | 97.2 | 808  | 148  | 169  | 421 | 0.4 | 0.001034 | 0.06 | 8.09 | 19.8 | 875 |
| XY20-07-18  | 0.04 | 3.18 | 0.25 | 4.54 | 9.89 | 0.22 | 62.0 | 21.6 | 251  | 94.2 | 415  | 82.9 | 728  | 135  | 196  | 279 | 0.7 | 0.000037 | 0.03 | 7.76 | 16.8 | 858 |
| XY20-07-19  | 0.07 | 2.68 | 0.13 | 1.64 | 5.41 | 0.08 | 39.2 | 15.7 | 209  | 82.4 | 372  | 75.4 | 675  | 124  | 123  | 471 | 0.3 | 0.000066 | 0.02 | 6.91 | 12.5 | 831 |
| XY20-07-20  | 0.10 | 2.10 | 0.15 | 3.27 | 8.91 | 0.19 | 61.3 | 26.1 | 298  | 99.3 | 387  | 70.0 | 581  | 101  | 178  | 778 | 0.2 | 0.000115 | 0.03 | 4.14 | 9.77 | 809 |
| XY20-07-21  | 0.06 | 5.55 | 0.45 | 6.99 | 14.6 | 0.37 | 74.8 | 25.4 | 288  | 103  | 448  | 87.1 | 756  | 140  | 262  | 323 | 0.8 | 0.000054 | 0.03 | 8.20 | 18.7 | 869 |
| XY20-07-22  | 0.24 | 1.91 | 0.12 | 1.91 | 5.61 | 0.11 | 37.0 | 17.2 | 242  | 97.4 | 471  | 97.5 | 879  | 164  | 120  | 412 | 0.3 | 0.000186 | 0.02 | 2.77 | 10.1 | 812 |
| XY20-07-23  | 0.00 | 1.65 | 0.02 | 1.17 | 4.19 | 0.07 | 28.1 | 11.3 | 145  | 57.0 | 264  | 54.7 | 495  | 94.9 | 110  | 364 | 0.3 | 0.000000 | 0.02 |      |      |     |
| XY20-07-24  | 0.14 | 2.17 | 0.05 | 0.86 | 3.52 | 0.12 | 22.5 | 9.65 | 123  | 47.8 | 228  | 47.7 | 423  | 82.1 | 62.3 | 223 | 0.3 | 0.000223 | 0.04 | 6.60 | 15.3 | 850 |
|             |      |      |      |      |      |      |      |      |      |      |      |      |      |      |      |     |     |          |      |      |      |     |
| YL20-01-07  | 0.00 | 1.22 | 0.11 | 2.32 | 8.95 | 0.15 | 58.7 | 19.8 | 209  | 65.6 | 245  | 45.2 | 380  | 67.0 | 114  | 497 | 0.2 |          | 0.02 | 34.2 | 8.93 | 801 |
| YL20-01-08  | 0.05 | 2.35 | 0.13 | 2.47 | 6.50 | 0.27 | 44.4 | 14.3 | 168  | 61.5 | 256  | 49.9 | 438  | 81.7 | 91.5 | 125 | 0.7 | 0.000076 | 0.05 | 22.7 | 22.4 | 887 |
| YL20-01-09  | 0.09 | 7.22 | 0.45 | 6.38 | 10.8 | 0.93 | 55.2 | 15.4 | 157  | 51.5 | 207  | 40.2 | 344  | 65.2 | 280  | 277 | 1.0 | 0.000177 | 0.12 | 14.6 |      |     |
| YL20-01-10  | 0.05 | 3.10 | 0.21 | 3.36 | 6.03 | 0.22 | 32.4 | 10.8 | 124  | 43.1 | 182  | 35.6 | 318  | 59.2 | 80.7 | 299 | 0.3 | 0.000112 | 0.05 | 21.0 | 7.62 | 787 |
| YL20-01-11  | 0.21 | 2.84 | 0.47 | 6.71 | 14.1 | 0.52 | 72.6 | 21.5 | 212  | 70.2 | 280  | 53.0 | 447  | 82.0 | 115  | 228 | 0.5 | 0.000316 | 0.05 | 21.6 | 23.9 | 894 |
| YL20-01-12  | 0.15 | 5.02 | 0.35 | 4.66 | 10.9 | 0.27 | 63.6 | 21.8 | 254  | 91.6 | 383  | 74.8 | 650  | 117  | 128  | 261 | 0.5 | 0.000159 | 0.03 | 26.3 | 20.2 | 877 |
| YL20-01-13  | 1.35 | 6.22 | 1.03 | 5.78 | 6.25 | 0.39 | 36.7 | 14.5 | 177  | 61.9 | 246  | 47.8 | 417  | 71.8 | 105  | 553 | 0.2 | 0.002192 | 0.08 | 15.5 | 13.4 | 837 |
| YL20-01-14  | 0.32 | 2.75 | 0.24 | 4.92 | 13.6 | 0.33 | 57.1 | 13.4 | 103  | 24.6 | 72.4 | 11.7 | 86.8 | 14.2 | 114  | 301 | 0.4 | 0.002493 | 0.04 | 27.0 | 8.43 | 796 |
| YL20-01-15  | 0.00 | 1.44 | 0.11 | 2.16 | 4.77 | 0.16 | 31.0 | 8.99 | 83.2 | 23.9 | 82.7 | 14.6 | 120  | 20.7 | 61.0 | 317 | 0.2 | 0.000028 | 0.04 | 25.7 | 7.18 | 783 |
| YL20-01-16  | 0.04 | 2.06 | 0.11 | 2.96 | 8.07 | 0.20 | 47.8 | 15.8 | 176  | 59.7 | 239  | 46.0 | 395  | 71.1 | 139  | 393 | 0.4 | 0.000070 | 0.03 | 26.9 | 14.9 | 847 |
| YL20-01-17  | 0.00 | 1.17 | 0.00 | 1.65 | 4.82 | 0.00 | 27.8 | 8.0  | 70.8 | 20.3 | 68.4 | 12.3 | 99.7 | 15.9 | 64.9 | 226 | 0.3 |          |      |      |      |     |
| YL20-01-18  | 2.75 | 19.0 | 1.81 | 11.2 | 10.5 | 0.96 | 43.9 | 13.7 | 148  | 50.3 | 207  | 43.3 | 400  | 76.0 | 190  | 445 | 0.4 | 0.004679 | 0.14 | 12.1 | 32.5 | 926 |
| YL20-01-19  | 1.97 | 51.2 | 2.44 | 12.4 | 10.5 | 1.19 | 36.0 | 11.5 | 114  | 34.6 | 127  | 24.9 | 218  | 39.5 | 118  | 306 | 0.4 | 0.006154 | 0.19 | 9.70 | 16.4 | 856 |

|            |      |      |      |      |      |      |       |      |      |      |      |      |     |      |      |      |     |          |      |      |      |     |
|------------|------|------|------|------|------|------|-------|------|------|------|------|------|-----|------|------|------|-----|----------|------|------|------|-----|
| YL20-01-20 | 0.03 | 1.04 | 0.08 | 1.14 | 4.99 | 0.13 | 30.0  | 9.10 | 82.2 | 24.0 | 87.5 | 15.9 | 131 | 23.8 | 65.6 | 215  | 0.3 | 0.000141 | 0.03 | 27.8 | 16.3 | 856 |
| YL20-01-21 | 0.03 | 1.39 | 0.12 | 2.61 | 5.98 | 0.18 | 39.3  | 13.5 | 155  | 53.8 | 227  | 44.1 | 390 | 71.5 | 78.5 | 197  | 0.4 | 0.000046 | 0.04 | 25.1 | 19.1 | 871 |
| YL20-01-22 | 2.41 | 7.42 | 0.66 | 4.53 | 5.81 | 0.20 | 30.9  | 10.0 | 106  | 35.3 | 141  | 27.9 | 246 | 45.5 | 88.4 | 317  | 0.3 | 0.006654 | 0.05 | 21.8 | 9.49 | 806 |
| YL20-01-23 | 15.8 | 61.1 | 5.84 | 29.8 | 11.7 | 0.41 | 43.3  | 12.9 | 155  | 58.4 | 255  | 52.2 | 469 | 89.4 | 129  | 241  | 0.5 | 0.022867 | 0.06 | 18.8 |      |     |
| YL20-01-24 | 0.02 | 1.29 | 0.10 | 1.33 | 4.99 | 0.14 | 33.2  | 12.3 | 149  | 55.7 | 246  | 51.7 | 488 | 96.6 | 77.6 | 313  | 0.2 | 0.000023 | 0.03 | 25.2 | 10.7 | 817 |
| YL20-02-07 | 1.68 | 7.83 | 1.21 | 14.0 | 23.0 | 0.59 | 120.1 | 37.4 | 403  | 141  | 544  | 101  | 830 | 150  | 231  | 295  | 0.8 | 0.001372 | 0.03 | 1.33 |      |     |
| YL20-02-08 | 0.02 | 2.05 | 0.26 | 4.79 | 13.1 | 0.18 | 75.2  | 20.6 | 192  | 56.7 | 214  | 39.6 | 339 | 62.9 | 186  | 499  | 0.4 | 0.000030 | 0.02 | 7.90 | 9.72 | 808 |
| YL20-02-09 | 0.23 | 3.03 | 0.30 | 5.04 | 9.33 | 0.27 | 49.6  | 17.3 | 191  | 68.0 | 282  | 55.3 | 476 | 89.4 | 142  | 348  | 0.4 | 0.000328 | 0.04 | 2.78 | 14.9 | 847 |
| YL20-02-10 | 0.01 | 1.21 | 0.13 | 1.96 | 5.31 | 0.12 | 30.0  | 8.76 | 88.5 | 27.2 | 104  | 19.6 | 170 | 32.4 | 58.8 | 173  | 0.3 | 0.000042 | 0.03 | 7.96 | 27.3 | 908 |
| YL20-02-11 | 0.22 | 2.19 | 0.15 | 2.45 | 5.70 | 0.21 | 41.1  | 14.8 | 172  | 62.1 | 252  | 48.4 | 405 | 77.6 | 110  | 251  | 0.4 | 0.000361 | 0.04 | 2.93 | 7.57 | 787 |
| YL20-02-12 | 0.00 | 0.97 | 0.06 | 1.91 | 6.56 | 0.13 | 48.7  | 16.1 | 161  | 49.6 | 187  | 33.9 | 279 | 50.6 | 79.1 | 350  | 0.2 |          | 0.02 |      |      |     |
| YL20-02-13 | 0.00 | 1.61 | 0.09 | 2.86 | 7.38 | 0.21 | 43.2  | 13.2 | 134  | 43.9 | 176  | 34.0 | 295 | 56.5 | 94.8 | 215  | 0.4 |          | 0.04 |      | 16.2 | 855 |
| YL20-02-14 | 0.12 | 4.85 | 0.55 | 8.94 | 14.9 | 0.57 | 79.9  | 26.0 | 294  | 106  | 442  | 83.6 | 702 | 132  | 294  | 311  | 0.9 | 0.000119 | 0.05 | 4.52 | 23.2 | 891 |
| YL20-02-15 | 0.00 | 21.8 | 0.0  | 1.85 | 3.42 | 1.33 | 17.6  | 5.17 | 58.9 | 21.6 | 100  | 21.0 | 202 | 43.5 | 52.1 | 86.5 | 0.6 |          | 0.53 |      | 16.0 | 854 |
| YL20-02-16 | 0.00 | 1.26 | 0.09 | 1.27 | 4.52 | 0.05 | 29.0  | 8.69 | 80.0 | 22.2 | 75.3 | 13.3 | 106 | 19.3 | 58.9 | 308  | 0.2 |          | 0.01 |      | 2.85 | 711 |
| YL20-02-17 | 0.28 | 4.77 | 0.33 | 4.15 | 7.96 | 0.70 | 51.2  | 17.6 | 183  | 59.1 | 233  | 43.1 | 364 | 65.4 | 120  | 391  | 0.3 | 0.000526 | 0.11 | 3.77 | 15.3 | 850 |
| YL20-02-18 | 1.76 | 21.7 | 1.9  | 11.3 | 10.7 | 4.41 | 49.7  | 16.2 | 173  | 55.9 | 220  | 42.4 | 379 | 68.6 | 105  | 616  | 0.2 | 0.003158 | 0.58 | 2.86 |      |     |
| YL20-02-19 | 0.14 | 1.47 | 0.15 | 2.57 | 6.39 | 0.06 | 40.2  | 13.1 | 132  | 40.4 | 154  | 28.9 | 242 | 45.6 | 105  | 397  | 0.3 | 0.000404 | 0.01 | 2.39 | 9.21 | 804 |
| YL20-02-20 | 0.03 | 0.89 | 0.06 | 2.03 | 6.22 | 0.17 | 41.1  | 12.7 | 122  | 34.7 | 120  | 20.5 | 171 | 29.7 | 61.8 | 324  | 0.2 | 0.000105 | 0.03 | 5.44 | 14.0 | 841 |
| YL20-02-21 | 0.01 | 1.40 | 0.11 | 1.99 | 6.72 | 0.12 | 44.7  | 14.7 | 139  | 41.0 | 149  | 26.6 | 228 | 41.3 | 89.7 | 461  | 0.2 | 0.000023 | 0.02 | 11.6 | 7.12 | 782 |
| YL20-02-22 | 0.31 | 2.97 | 0.16 | 2.05 | 6.87 | 0.31 | 36.4  | 11.4 | 114  | 35.0 | 137  | 27.1 | 236 | 46.6 | 86.0 | 430  | 0.2 | 0.000879 | 0.06 | 3.23 | 5.62 | 763 |
| YL20-02-23 | 0.02 | 0.90 | 0.06 | 1.42 | 5.88 | 0.07 | 46.6  | 16.3 | 155  | 43.2 | 147  | 25.6 | 191 | 32.7 | 70.8 | 420  | 0.2 | 0.000054 | 0.01 | 7.15 | 6.75 | 777 |
| YL20-02-24 | 0.22 | 12.4 | 0.25 | 2.08 | 5.84 | 0.71 | 35.7  | 11.7 | 111  | 34.4 | 137  | 28.4 | 268 | 54.7 | 144  | 303  | 0.5 | 0.000561 | 0.15 | 12.7 | 11.4 | 822 |
| YL20-03-07 | 0.00 | 0.63 | 0.02 | 0.78 | 3.83 | 0.03 | 29.1  | 10.9 | 111  | 30.8 | 102  | 16.8 | 130 | 21.4 | 48.4 | 391  | 0.1 |          | 0.01 |      |      |     |
| YL20-03-08 | 0.00 | 1.59 | 0.16 | 2.32 | 6.68 | 0.23 | 39.4  | 13.1 | 144  | 51.7 | 217  | 42.7 | 379 | 73.4 | 78.0 | 171  | 0.5 |          | 0.04 |      | 16.1 | 855 |
| YL20-03-09 | 0.00 | 0.86 | 0.07 | 1.12 | 4.93 | 0.11 | 32.1  | 10.3 | 109  | 31.7 | 120  | 22.4 | 190 | 34.6 | 56.0 | 283  | 0.2 |          | 0.03 |      | 9.74 | 808 |
| YL20-03-10 | 0.02 | 1.76 | 0.13 | 1.57 | 5.71 | 0.19 | 32.4  | 9.59 | 88.5 | 24.5 | 83.2 | 15.6 | 123 | 21.0 | 96.6 | 395  | 0.2 | 0.000092 | 0.04 | 9.00 | 5.08 | 755 |
| YL20-03-11 | 0.21 | 2.37 | 0.19 | 2.36 | 6.06 | 0.23 | 40.1  | 14.4 | 170  | 59.9 | 246  | 45.6 | 389 | 71.1 | 101  | 281  | 0.4 | 0.000362 | 0.04 | 2.87 | 15.7 | 852 |
| YL20-03-12 | 0.08 | 5.13 | 0.11 | 1.72 | 5.71 | 0.23 | 35.5  | 11.7 | 101  | 23.8 | 75.0 | 13.0 | 110 | 20.6 | 91.0 | 576  | 0.2 | 0.000475 | 0.05 | 13.5 | 6.27 | 771 |
| YL20-03-13 | 0.03 | 1.49 | 0.06 | 2.52 | 7.68 | 0.18 | 42.2  | 13.1 | 114  | 30.2 | 102  | 17.3 | 133 | 23.3 | 93.7 | 304  | 0.3 | 0.000153 | 0.03 | 8.20 | 9.68 | 808 |

|            |      |      |      |      |      |      |      |      |      |      |      |      |      |      |      |     |     |          |      |      |      |     |
|------------|------|------|------|------|------|------|------|------|------|------|------|------|------|------|------|-----|-----|----------|------|------|------|-----|
| YL20-03-14 | 0.01 | 2.68 | 0.07 | 1.62 | 6.96 | 0.15 | 47.1 | 15.1 | 144  | 42.5 | 155  | 27.9 | 232  | 42.4 | 99.2 | 402 | 0.2 | 0.000020 | 0.03 | 30.4 | 4.83 | 751 |
| YL20-03-15 | 0.00 | 1.43 | 0.10 | 2.28 | 6.65 | 0.12 | 41.4 | 13.1 | 123  | 34.3 | 118  | 19.8 | 153  | 26.4 | 84.7 | 242 | 0.3 |          | 0.02 |      | 12.3 | 830 |
| YL20-03-16 | 0.22 | 2.21 | 0.38 | 2.76 | 6.57 | 0.24 | 39.2 | 12.9 | 132  | 43.2 | 174  | 33.9 | 295  | 56.1 | 86.5 | 369 | 0.2 | 0.000505 | 0.05 | 1.86 |      |     |
| YL20-03-17 | 0.12 | 1.47 | 0.17 | 2.08 | 5.09 | 0.10 | 36.2 | 11.3 | 126  | 44.1 | 180  | 36.1 | 315  | 61.0 | 86.8 | 246 | 0.4 | 0.000268 | 0.02 | 2.44 | 19.9 | 875 |
| YL20-03-18 | 0.09 | 1.70 | 0.05 | 0.77 | 2.80 | 0.19 | 19.0 | 6.44 | 70.7 | 24.1 | 99.2 | 19.9 | 175  | 32.1 | 50.7 | 402 | 0.1 | 0.000344 | 0.08 | 6.01 | 2.71 | 708 |
| YL20-03-19 | 0.03 | 1.55 | 0.10 | 1.91 | 6.16 | 0.22 | 40.5 | 13.4 | 141  | 47.8 | 203  | 40.0 | 352  | 66.1 | 84.2 | 339 | 0.2 | 0.000062 | 0.04 | 6.62 | 13.6 | 839 |
| YL20-03-20 | 1.07 | 10.5 | 0.30 | 2.82 | 6.48 | 0.54 | 40.6 | 12.8 | 127  | 39.8 | 160  | 33.2 | 307  | 58.9 | 106  | 470 | 0.2 | 0.002371 | 0.10 | 4.48 | 4.36 | 743 |
| YL20-03-21 | 0.17 | 33.5 | 0.16 | 3.02 | 4.58 | 1.15 | 26.2 | 7.85 | 91.9 | 35.7 | 162  | 34.6 | 325  | 65.0 | 91.2 | 101 | 0.9 | 0.000351 | 0.32 | 49.7 | 16.3 | 856 |
| YL20-03-22 | 2.39 | 76.3 | 2.34 | 12.5 | 12.8 | 1.68 | 47.9 | 11.6 | 92.0 | 22.1 | 70   | 12.0 | 96.1 | 15.9 | 71.0 | 440 | 0.2 | 0.016885 | 0.21 | 7.80 | 5.84 | 766 |
| YL20-03-23 | 4.64 | 18.2 | 1.19 | 7.31 | 8.53 | 0.49 | 38.8 | 12.1 | 126  | 40.8 | 167  | 33.5 | 303  | 56.7 | 76.9 | 342 | 0.2 | 0.010405 | 0.08 | 1.87 | 18.1 | 866 |
| YL20-03-24 | 0.02 | 5.97 | 0.20 | 3.60 | 10.7 | 0.23 | 51.7 | 13.4 | 124  | 37.0 | 137  | 25.4 | 218  | 40.0 | 132  | 275 | 0.5 | 0.000073 | 0.03 | 21.2 | 19.5 | 873 |

**\*Postfix c denotes inherited zircon domain; the spots without postfix for the Magmatic zircon.**

**$T$  (°C) zircon=  $(5080 \pm 30)/[6.01 \pm 0.03 - \log(\text{Ti})] - 273$ , Reference to the [132].**
