# Supplementary material
Source: MDPI journal article supplement (https://www.mdpi.com/2075-163X/12/7/910)
Supplement: s1 [file s1]

**Supplementary Table S1. LA-ICPMS zircon U-Pb isotope data for the early Neoproterozoic granitic rocks in the western margin of the NQT**

| Sample spot | Th   | U   | Pb   | Th/U | Isotopic ratios                      |         |                                     |         |                                     |         | Age (Ma)                             |    |                                     |    |                                     |    |
|-------------|------|-----|------|------|--------------------------------------|---------|-------------------------------------|---------|-------------------------------------|---------|--------------------------------------|----|-------------------------------------|----|-------------------------------------|----|
|             | ppm  | ppm | ppm  |      | <sup>207</sup> Pb/ <sup>206</sup> Pb | 2σ      | <sup>207</sup> Pb/ <sup>235</sup> U | 2σ      | <sup>206</sup> Pb/ <sup>238</sup> U | 2σ      | <sup>207</sup> Pb/ <sup>206</sup> Pb | 2σ | <sup>207</sup> Pb/ <sup>235</sup> U | 2σ | <sup>206</sup> Pb/ <sup>238</sup> U | 2σ |
| WS20-01-01  | 129  | 606 | 665  | 0.2  | 0.07033                              | 0.04451 | 1.47187                             | 0.07122 | 0.15179                             | 0.00382 | 938                                  | 97 | 919                                 | 29 | 911                                 | 21 |
| WS20-01-02  | 80.5 | 687 | 440  | 0.1  | 0.07207                              | 0.04959 | 1.54265                             | 0.05096 | 0.15527                             | 0.00356 | 988                                  | 65 | 948                                 | 20 | 931                                 | 20 |
| WS20-01-03  | 129  | 444 | 675  | 0.3  | 0.06980                              | 0.04733 | 1.49897                             | 0.04679 | 0.15578                             | 0.00353 | 922                                  | 61 | 930                                 | 19 | 933                                 | 20 |
| WS20-01-04  | 107  | 609 | 559  | 0.2  | 0.07141                              | 0.04609 | 1.60020                             | 0.06815 | 0.16256                             | 0.00395 | 969                                  | 84 | 970                                 | 27 | 971                                 | 22 |
| WS20-01-05  | 120  | 580 | 643  | 0.2  | 0.07389                              | 0.04682 | 1.53073                             | 0.04726 | 0.15029                             | 0.00341 | 1038                                 | 60 | 943                                 | 19 | 903                                 | 19 |
| WS20-01-06  | 148  | 592 | 781  | 0.3  | 0.07204                              | 0.04729 | 1.50289                             | 0.04493 | 0.15133                             | 0.00342 | 987                                  | 58 | 932                                 | 18 | 908                                 | 19 |
| WS20-01-07  | 155  | 429 | 308  | 0.4  | 0.07021                              | 0.00220 | 1.52622                             | 0.04486 | 0.15768                             | 0.00300 | 935                                  | 31 | 941                                 | 18 | 944                                 | 17 |
| WS20-01-08  | 82.2 | 310 | 213  | 0.3  | 0.06973                              | 0.00230 | 1.48275                             | 0.04606 | 0.15424                             | 0.00296 | 920                                  | 34 | 923                                 | 19 | 925                                 | 17 |
| WS20-01-09  | 78.8 | 420 | 278  | 0.2  | 0.06907                              | 0.00203 | 1.44279                             | 0.03960 | 0.15153                             | 0.00283 | 901                                  | 28 | 907                                 | 16 | 910                                 | 16 |
| WS20-01-10  | 168  | 401 | 282  | 0.4  | 0.07018                              | 0.00214 | 1.50494                             | 0.04288 | 0.15555                             | 0.00293 | 934                                  | 30 | 932                                 | 17 | 932                                 | 16 |
| WS20-01-11  | 154  | 394 | 275  | 0.4  | 0.06977                              | 0.00209 | 1.48327                             | 0.04157 | 0.15419                             | 0.00289 | 922                                  | 29 | 924                                 | 17 | 924                                 | 16 |
| WS20-01-13  | 210  | 401 | 286  | 0.5  | 0.07045                              | 0.00211 | 1.51703                             | 0.04238 | 0.15619                             | 0.00291 | 941                                  | 29 | 937                                 | 17 | 936                                 | 16 |
| WS20-01-15  | 253  | 582 | 404  | 0.4  | 0.06991                              | 0.00192 | 1.49449                             | 0.03792 | 0.15506                             | 0.00283 | 926                                  | 25 | 928                                 | 15 | 929                                 | 16 |
| WS20-01-16  | 182  | 505 | 343  | 0.4  | 0.06994                              | 0.00208 | 1.49644                             | 0.04129 | 0.15518                             | 0.00287 | 927                                  | 29 | 929                                 | 17 | 930                                 | 16 |
| WS20-01-17  | 74.4 | 646 | 429  | 0.1  | 0.07065                              | 0.00191 | 1.51315                             | 0.03757 | 0.15535                             | 0.00282 | 947                                  | 24 | 936                                 | 15 | 931                                 | 16 |
| WS20-01-18  | 136  | 399 | 272  | 0.3  | 0.07005                              | 0.00225 | 1.49089                             | 0.04492 | 0.15436                             | 0.00291 | 930                                  | 33 | 927                                 | 18 | 925                                 | 16 |
| WS20-01-19  | 178  | 411 | 287  | 0.4  | 0.07058                              | 0.00213 | 1.53272                             | 0.04296 | 0.15752                             | 0.00291 | 945                                  | 29 | 944                                 | 17 | 943                                 | 16 |
| WS20-01-20  | 188  | 465 | 317  | 0.4  | 0.07016                              | 0.00209 | 1.51211                             | 0.04180 | 0.15633                             | 0.00287 | 933                                  | 29 | 935                                 | 17 | 936                                 | 16 |
| WS20-01-21  | 197  | 448 | 314  | 0.4  | 0.07050                              | 0.00209 | 1.54851                             | 0.04238 | 0.15932                             | 0.00292 | 943                                  | 28 | 950                                 | 17 | 953                                 | 16 |
| WS20-01-22  | 192  | 424 | 300  | 0.5  | 0.07032                              | 0.00213 | 1.53700                             | 0.04313 | 0.15854                             | 0.00292 | 938                                  | 29 | 945                                 | 17 | 949                                 | 16 |
| WS20-01-23  | 116  | 330 | 225  | 0.4  | 0.06958                              | 0.00239 | 1.47866                             | 0.04774 | 0.15415                             | 0.00292 | 916                                  | 36 | 922                                 | 20 | 924                                 | 16 |
| WS20-01-24  | 182  | 450 | 316  | 0.4  | 0.07086                              | 0.00209 | 1.56221                             | 0.04249 | 0.15991                             | 0.00292 | 953                                  | 28 | 955                                 | 17 | 956                                 | 16 |
| WS20-02-01  | 87.9 | 678 | 487  | 0.1  | 0.07497                              | 0.05174 | 1.62010                             | 0.05308 | 0.15676                             | 0.00360 | 1068                                 | 63 | 978                                 | 21 | 939                                 | 20 |
| WS20-02-02  | 43.4 | 379 | 248  | 0.1  | 0.07020                              | 0.05028 | 1.50911                             | 0.07415 | 0.15595                             | 0.00395 | 934                                  | 98 | 934                                 | 30 | 934                                 | 22 |
| WS20-02-03  | 161  | 657 | 1004 | 0.2  | 0.07463                              | 0.05651 | 1.62034                             | 0.05045 | 0.15750                             | 0.00359 | 1058                                 | 60 | 978                                 | 20 | 943                                 | 20 |
| WS20-02-04  | 142  | 529 | 718  | 0.3  | 0.07053                              | 0.04701 | 1.51311                             | 0.05037 | 0.15564                             | 0.00359 | 944                                  | 65 | 936                                 | 20 | 933                                 | 20 |
| WS20-02-05  | 53.9 | 351 | 278  | 0.2  | 0.07111                              | 0.04654 | 1.49065                             | 0.05058 | 0.15208                             | 0.00352 | 961                                  | 66 | 927                                 | 21 | 913                                 | 20 |

|            |      |     |     |     |         |         |         |         |         |         |      |     |     |    |     |    |
|------------|------|-----|-----|-----|---------|---------|---------|---------|---------|---------|------|-----|-----|----|-----|----|
| WS20-02-06 | 76.8 | 563 | 374 | 0.1 | 0.07311 | 0.04378 | 1.54466 | 0.04736 | 0.15328 | 0.00349 | 1017 | 59  | 948 | 19 | 919 | 20 |
| WS20-02-09 | 114  | 317 | 217 | 0.4 | 0.06976 | 0.00220 | 1.46469 | 0.04386 | 0.15229 | 0.00297 | 921  | 32  | 916 | 18 | 914 | 17 |
| WS20-02-10 | 86   | 248 | 170 | 0.3 | 0.07006 | 0.00265 | 1.47660 | 0.05354 | 0.15288 | 0.00313 | 930  | 42  | 921 | 22 | 917 | 18 |
| WS20-02-11 | 162  | 470 | 317 | 0.3 | 0.06930 | 0.00207 | 1.45420 | 0.04108 | 0.15220 | 0.00293 | 908  | 29  | 912 | 17 | 913 | 16 |
| WS20-02-12 | 81   | 379 | 256 | 0.2 | 0.07063 | 0.00227 | 1.53473 | 0.04687 | 0.15760 | 0.00308 | 947  | 32  | 944 | 19 | 943 | 17 |
| WS20-02-14 | 142  | 397 | 274 | 0.4 | 0.06992 | 0.00222 | 1.51158 | 0.04553 | 0.15680 | 0.00304 | 926  | 32  | 935 | 18 | 939 | 17 |
| WS20-02-16 | 103  | 449 | 300 | 0.2 | 0.06989 | 0.00206 | 1.49492 | 0.04146 | 0.15512 | 0.00295 | 925  | 28  | 928 | 17 | 930 | 16 |
| WS20-02-18 | 170  | 424 | 301 | 0.4 | 0.07088 | 0.00212 | 1.56675 | 0.04414 | 0.16031 | 0.00306 | 954  | 29  | 957 | 17 | 958 | 17 |
| WS20-02-19 | 150  | 411 | 284 | 0.4 | 0.07036 | 0.00222 | 1.51325 | 0.04510 | 0.15598 | 0.00300 | 939  | 32  | 936 | 18 | 934 | 17 |
| WS20-02-20 | 140  | 404 | 274 | 0.3 | 0.06946 | 0.00222 | 1.47138 | 0.04442 | 0.15365 | 0.00295 | 912  | 32  | 919 | 18 | 921 | 16 |
| WS20-02-21 | 203  | 478 | 347 | 0.4 | 0.07295 | 0.00207 | 1.61417 | 0.04292 | 0.16049 | 0.00301 | 1013 | 26  | 976 | 17 | 959 | 17 |
| WS20-02-23 | 140  | 424 | 293 | 0.3 | 0.06995 | 0.00213 | 1.49130 | 0.04272 | 0.15463 | 0.00293 | 927  | 30  | 927 | 17 | 927 | 16 |
| WS20-02-24 | 247  | 520 | 363 | 0.5 | 0.07313 | 0.00213 | 1.53970 | 0.04199 | 0.15272 | 0.00287 | 1018 | 27  | 946 | 17 | 916 | 16 |
|            |      |     |     |     |         |         |         |         |         |         |      |     |     |    |     |    |
| WS20-03-01 | 138  | 338 | 726 | 0.4 | 0.07027 | 0.04648 | 1.51206 | 0.04947 | 0.15605 | 0.00355 | 936  | 65  | 935 | 20 | 935 | 20 |
| WS20-03-02 | 96.3 | 389 | 502 | 0.2 | 0.07054 | 0.04674 | 1.53985 | 0.05438 | 0.15831 | 0.00366 | 944  | 70  | 946 | 22 | 947 | 20 |
| WS20-03-03 | 117  | 465 | 629 | 0.3 | 0.06957 | 0.04742 | 1.46791 | 0.04492 | 0.15302 | 0.00344 | 916  | 60  | 917 | 18 | 918 | 19 |
| WS20-03-04 | 148  | 509 | 794 | 0.3 | 0.07023 | 0.04704 | 1.50759 | 0.05388 | 0.15570 | 0.00361 | 935  | 71  | 934 | 22 | 933 | 20 |
| WS20-03-05 | 76.8 | 352 | 400 | 0.2 | 0.07028 | 0.04654 | 1.52110 | 0.08717 | 0.15697 | 0.00420 | 937  | 114 | 939 | 35 | 940 | 23 |
| WS20-03-07 | 158  | 433 | 287 | 0.4 | 0.07051 | 0.00169 | 1.44684 | 0.03385 | 0.14883 | 0.00174 | 943  | 48  | 909 | 14 | 894 | 10 |
| WS20-03-08 | 134  | 356 | 246 | 0.4 | 0.06924 | 0.00180 | 1.47290 | 0.03751 | 0.15430 | 0.00185 | 906  | 53  | 919 | 15 | 925 | 10 |
| WS20-03-09 | 155  | 430 | 286 | 0.4 | 0.07072 | 0.00169 | 1.44709 | 0.03389 | 0.14843 | 0.00173 | 949  | 48  | 909 | 14 | 892 | 10 |
| WS20-03-11 | 103  | 371 | 247 | 0.3 | 0.06929 | 0.00177 | 1.44556 | 0.03605 | 0.15132 | 0.00180 | 908  | 52  | 908 | 15 | 908 | 10 |
| WS20-03-13 | 115  | 327 | 223 | 0.4 | 0.07086 | 0.00190 | 1.50503 | 0.03947 | 0.15407 | 0.00187 | 953  | 54  | 932 | 16 | 924 | 10 |
| WS20-03-14 | 133  | 365 | 255 | 0.4 | 0.06971 | 0.00178 | 1.53002 | 0.03821 | 0.15921 | 0.00189 | 920  | 52  | 943 | 15 | 952 | 11 |
| WS20-03-15 | 106  | 330 | 217 | 0.3 | 0.06859 | 0.00191 | 1.42064 | 0.03866 | 0.15025 | 0.00183 | 886  | 57  | 898 | 16 | 902 | 10 |
| WS20-03-16 | 139  | 380 | 258 | 0.4 | 0.06947 | 0.00177 | 1.49180 | 0.03710 | 0.15579 | 0.00184 | 913  | 52  | 927 | 15 | 933 | 10 |
| WS20-03-18 | 259  | 316 | 231 | 0.8 | 0.07280 | 0.00197 | 1.56939 | 0.04137 | 0.15640 | 0.00190 | 1008 | 54  | 958 | 16 | 937 | 11 |
| WS20-03-20 | 155  | 447 | 314 | 0.3 | 0.07004 | 0.00165 | 1.53494 | 0.03524 | 0.15900 | 0.00182 | 930  | 48  | 945 | 14 | 951 | 10 |
| WS20-03-21 | 165  | 442 | 301 | 0.4 | 0.07082 | 0.00168 | 1.50989 | 0.03490 | 0.15468 | 0.00177 | 952  | 48  | 934 | 14 | 927 | 10 |
| WS20-03-22 | 193  | 484 | 339 | 0.4 | 0.07143 | 0.00160 | 1.57245 | 0.03442 | 0.15973 | 0.00180 | 970  | 45  | 959 | 14 | 955 | 10 |

|            |      |     |      |     |         |         |         |         |         |         |      |    |     |    |     |    |
|------------|------|-----|------|-----|---------|---------|---------|---------|---------|---------|------|----|-----|----|-----|----|
| WS20-03-23 | 171  | 520 | 351  | 0.3 | 0.06863 | 0.00155 | 1.46646 | 0.03225 | 0.15504 | 0.00173 | 888  | 46 | 917 | 13 | 929 | 10 |
| WS20-03-24 | 188  | 473 | 329  | 0.4 | 0.07086 | 0.00164 | 1.53635 | 0.03457 | 0.15733 | 0.00178 | 953  | 47 | 945 | 14 | 942 | 10 |
| YL20-01-01 | 55.2 | 443 | 292  | 0.1 | 0.07092 | 0.00302 | 1.56557 | 0.06696 | 0.16013 | 0.00389 | 955  | 85 | 957 | 27 | 958 | 22 |
| YL20-01-04 | 116  | 691 | 435  | 0.2 | 0.07317 | 0.00221 | 1.57032 | 0.04882 | 0.15567 | 0.00353 | 1019 | 60 | 959 | 19 | 933 | 20 |
| YL20-01-07 | 114  | 497 | 336  | 0.2 | 0.07062 | 0.00200 | 1.55394 | 0.04040 | 0.15950 | 0.00287 | 946  | 26 | 952 | 16 | 954 | 16 |
| YL20-01-08 | 91.5 | 125 | 92.4 | 0.7 | 0.06986 | 0.00328 | 1.49289 | 0.06709 | 0.15491 | 0.00326 | 924  | 58 | 927 | 27 | 928 | 18 |
| YL20-01-09 | 280  | 277 | 199  | 1.0 | 0.06972 | 0.00232 | 1.48205 | 0.04608 | 0.15411 | 0.00287 | 920  | 35 | 923 | 19 | 924 | 16 |
| YL20-01-10 | 80.7 | 299 | 198  | 0.3 | 0.06993 | 0.00227 | 1.49459 | 0.04515 | 0.15495 | 0.00286 | 926  | 33 | 928 | 18 | 929 | 16 |
| YL20-01-11 | 115  | 228 | 161  | 0.5 | 0.06901 | 0.00248 | 1.48298 | 0.04996 | 0.15580 | 0.00295 | 899  | 39 | 923 | 20 | 933 | 16 |
| YL20-01-13 | 105  | 553 | 363  | 0.2 | 0.07026 | 0.00199 | 1.49302 | 0.03829 | 0.15414 | 0.00272 | 936  | 26 | 928 | 16 | 924 | 15 |
| YL20-01-14 | 114  | 301 | 208  | 0.4 | 0.06957 | 0.00224 | 1.52274 | 0.04535 | 0.15878 | 0.00288 | 916  | 33 | 940 | 18 | 950 | 16 |
| YL20-01-15 | 61.0 | 317 | 213  | 0.2 | 0.06750 | 0.00214 | 1.45641 | 0.04245 | 0.15653 | 0.00282 | 853  | 32 | 913 | 18 | 937 | 16 |
| YL20-01-16 | 139  | 393 | 274  | 0.4 | 0.07088 | 0.00223 | 1.54592 | 0.04466 | 0.15822 | 0.00285 | 954  | 31 | 949 | 18 | 947 | 16 |
| YL20-01-17 | 64.9 | 226 | 155  | 0.3 | 0.07060 | 0.00268 | 1.53457 | 0.05474 | 0.15770 | 0.00300 | 946  | 43 | 944 | 22 | 944 | 17 |
| YL20-01-20 | 65.6 | 215 | 152  | 0.3 | 0.07043 | 0.00267 | 1.54564 | 0.05474 | 0.15931 | 0.00301 | 941  | 42 | 949 | 22 | 953 | 17 |
| YL20-01-21 | 78.5 | 197 | 138  | 0.4 | 0.06966 | 0.00264 | 1.48602 | 0.05268 | 0.15486 | 0.00291 | 918  | 43 | 925 | 22 | 928 | 16 |
| YL20-01-24 | 77.6 | 313 | 216  | 0.2 | 0.07115 | 0.00232 | 1.51024 | 0.04506 | 0.15414 | 0.00275 | 962  | 33 | 935 | 18 | 924 | 15 |
| YL20-02-02 | 41.3 | 728 | 462  | 0.1 | 0.08005 | 0.10227 | 1.61975 | 0.04863 | 0.14678 | 0.00334 | 1198 | 56 | 978 | 19 | 883 | 19 |
| YL20-02-04 | 67.5 | 598 | 425  | 0.1 | 0.07599 | 0.06049 | 1.66351 | 0.05064 | 0.15882 | 0.00363 | 1095 | 58 | 995 | 19 | 950 | 20 |
| YL20-02-05 | 53.4 | 218 | 283  | 0.2 | 0.07064 | 0.04935 | 1.51208 | 0.07403 | 0.15529 | 0.00395 | 947  | 97 | 935 | 30 | 931 | 22 |
| YL20-02-06 | 116  | 420 | 1087 | 0.3 | 0.07578 | 0.05059 | 1.60290 | 0.06426 | 0.15344 | 0.00371 | 1089 | 78 | 971 | 25 | 920 | 21 |
| YL20-02-08 | 186  | 499 | 336  | 0.4 | 0.07055 | 0.00200 | 1.45542 | 0.03715 | 0.14960 | 0.00258 | 944  | 26 | 912 | 15 | 899 | 14 |
| YL20-02-09 | 142  | 348 | 242  | 0.4 | 0.07119 | 0.00218 | 1.49239 | 0.04157 | 0.15203 | 0.00268 | 963  | 30 | 927 | 17 | 912 | 15 |
| YL20-02-10 | 58.8 | 173 | 121  | 0.3 | 0.06906 | 0.00268 | 1.46769 | 0.05337 | 0.15412 | 0.00291 | 901  | 44 | 917 | 22 | 924 | 16 |
| YL20-02-11 | 110  | 251 | 174  | 0.4 | 0.06951 | 0.00245 | 1.46081 | 0.04789 | 0.15242 | 0.00280 | 914  | 38 | 914 | 20 | 915 | 16 |
| YL20-02-12 | 79.1 | 350 | 238  | 0.2 | 0.06787 | 0.00217 | 1.46118 | 0.04286 | 0.15613 | 0.00275 | 865  | 33 | 914 | 18 | 935 | 15 |
| YL20-02-13 | 94.8 | 215 | 153  | 0.4 | 0.06957 | 0.00244 | 1.47325 | 0.04787 | 0.15360 | 0.00280 | 916  | 38 | 919 | 20 | 921 | 16 |
| YL20-02-14 | 294  | 311 | 231  | 0.9 | 0.07532 | 0.00234 | 1.58768 | 0.04501 | 0.15288 | 0.00271 | 1077 | 30 | 965 | 18 | 917 | 15 |
| YL20-02-16 | 58.9 | 308 | 234  | 0.2 | 0.07174 | 0.00237 | 1.61084 | 0.04913 | 0.16285 | 0.00292 | 979  | 34 | 974 | 19 | 973 | 16 |
| YL20-02-17 | 120  | 391 | 270  | 0.3 | 0.07852 | 0.00237 | 1.63527 | 0.04480 | 0.15106 | 0.00266 | 1160 | 28 | 984 | 17 | 907 | 15 |

|             |      |     |     |     |         |         |         |         |         |         |      |    |      |    |      |    |
|-------------|------|-----|-----|-----|---------|---------|---------|---------|---------|---------|------|----|------|----|------|----|
| YL20-02-18  | 105  | 616 | 412 | 0.2 | 0.07824 | 0.00220 | 1.65578 | 0.04189 | 0.15351 | 0.00266 | 1153 | 25 | 992  | 16 | 921  | 15 |
| YL20-02-19  | 105  | 397 | 279 | 0.3 | 0.07917 | 0.00250 | 1.69284 | 0.04890 | 0.15510 | 0.00278 | 1176 | 30 | 1006 | 18 | 929  | 16 |
| YL20-02-20  | 61.8 | 324 | 220 | 0.2 | 0.06925 | 0.00227 | 1.48058 | 0.04478 | 0.15508 | 0.00278 | 906  | 34 | 922  | 18 | 929  | 16 |
| YL20-02-21  | 89.7 | 461 | 313 | 0.2 | 0.07020 | 0.00206 | 1.50106 | 0.03999 | 0.15510 | 0.00271 | 934  | 28 | 931  | 16 | 929  | 15 |
| YL20-02-22  | 86.0 | 430 | 300 | 0.2 | 0.07641 | 0.00219 | 1.67338 | 0.04340 | 0.15884 | 0.00277 | 1106 | 26 | 998  | 16 | 950  | 15 |
| YL20-02-23  | 70.8 | 420 | 275 | 0.2 | 0.07175 | 0.00223 | 1.50856 | 0.04285 | 0.15251 | 0.00270 | 979  | 31 | 934  | 17 | 915  | 15 |
|             |      |     |     |     |         |         |         |         |         |         |      |    |      |    |      |    |
| YL20-03-01  | 52.7 | 543 | 278 | 0.1 | 0.07227 | 0.04756 | 1.52988 | 0.05491 | 0.15357 | 0.00361 | 994  | 70 | 943  | 22 | 921  | 20 |
| YL20-03-02  | 75.4 | 661 | 377 | 0.1 | 0.07119 | 0.04668 | 1.52326 | 0.04927 | 0.15522 | 0.00358 | 963  | 63 | 940  | 20 | 930  | 20 |
| YL20-03-05  | 60.1 | 413 | 332 | 0.1 | 0.07499 | 0.00319 | 1.56738 | 0.06682 | 0.15162 | 0.00370 | 1068 | 83 | 957  | 26 | 910  | 21 |
| YL20-03-06  | 57.8 | 421 | 333 | 0.1 | 0.07001 | 0.00235 | 1.47807 | 0.05054 | 0.15314 | 0.00353 | 929  | 67 | 921  | 21 | 919  | 20 |
| YL20-03-07  | 48.4 | 391 | 261 | 0.1 | 0.07017 | 0.00224 | 1.49614 | 0.04339 | 0.15473 | 0.00272 | 933  | 32 | 929  | 18 | 927  | 15 |
| YL20-03-08  | 78.0 | 171 | 123 | 0.5 | 0.07284 | 0.00279 | 1.55925 | 0.05559 | 0.15534 | 0.00290 | 1010 | 43 | 954  | 22 | 931  | 16 |
| YL20-03-09  | 56.0 | 283 | 195 | 0.2 | 0.07332 | 0.00247 | 1.58284 | 0.04896 | 0.15665 | 0.00281 | 1023 | 35 | 963  | 19 | 938  | 16 |
| YL20-03-10  | 96.6 | 395 | 261 | 0.2 | 0.07296 | 0.00229 | 1.52489 | 0.04341 | 0.15164 | 0.00267 | 1013 | 31 | 940  | 17 | 910  | 15 |
| YL20-03-11  | 101  | 281 | 196 | 0.4 | 0.07405 | 0.00243 | 1.58834 | 0.04778 | 0.15563 | 0.00278 | 1043 | 33 | 966  | 19 | 932  | 16 |
| YL20-03-13  | 93.7 | 304 | 206 | 0.3 | 0.07102 | 0.00240 | 1.51539 | 0.04720 | 0.15480 | 0.00279 | 958  | 35 | 937  | 19 | 928  | 16 |
| YL20-03-14  | 99.2 | 402 | 280 | 0.2 | 0.07336 | 0.00215 | 1.61944 | 0.04290 | 0.16013 | 0.00280 | 1024 | 27 | 978  | 17 | 957  | 16 |
| YL20-03-15  | 84.7 | 242 | 169 | 0.3 | 0.07218 | 0.00254 | 1.56228 | 0.05094 | 0.15701 | 0.00289 | 991  | 37 | 955  | 20 | 940  | 16 |
| YL20-03-16  | 86.5 | 369 | 252 | 0.2 | 0.07115 | 0.00223 | 1.54271 | 0.04426 | 0.15729 | 0.00279 | 962  | 31 | 948  | 18 | 942  | 16 |
| YL20-03-17  | 86.8 | 246 | 167 | 0.4 | 0.07213 | 0.00263 | 1.52756 | 0.05192 | 0.15362 | 0.00286 | 990  | 40 | 942  | 21 | 921  | 16 |
| YL20-03-18  | 50.7 | 402 | 273 | 0.1 | 0.07157 | 0.00214 | 1.56995 | 0.04263 | 0.15912 | 0.00280 | 974  | 29 | 958  | 17 | 952  | 16 |
| YL20-03-19  | 84.2 | 339 | 231 | 0.2 | 0.07012 | 0.00226 | 1.51033 | 0.04495 | 0.15623 | 0.00282 | 932  | 33 | 935  | 18 | 936  | 16 |
| YL20-03-20  | 106  | 470 | 329 | 0.2 | 0.07328 | 0.00212 | 1.62400 | 0.04263 | 0.16073 | 0.00283 | 1022 | 27 | 980  | 16 | 961  | 16 |
| YL20-03-22  | 71.0 | 440 | 297 | 0.2 | 0.07593 | 0.00228 | 1.64887 | 0.04514 | 0.15751 | 0.00281 | 1093 | 28 | 989  | 17 | 943  | 16 |
| YL20-03-23  | 76.9 | 342 | 239 | 0.2 | 0.07448 | 0.00243 | 1.62237 | 0.04888 | 0.15799 | 0.00288 | 1055 | 33 | 979  | 19 | 946  | 16 |
|             |      |     |     |     |         |         |         |         |         |         |      |    |      |    |      |    |
| XY20-02-02  | 157  | 589 | 839 | 0.3 | 0.07013 | 0.00266 | 1.50793 | 0.05768 | 0.15597 | 0.00369 | 932  | 42 | 934  | 23 | 934  | 21 |
| XY20-02-03  | 76.3 | 564 | 400 | 0.1 | 0.06978 | 0.00218 | 1.48569 | 0.04750 | 0.15443 | 0.00353 | 922  | 32 | 925  | 19 | 926  | 20 |
| XY20-02-04c | 55.6 | 808 | 497 | 0.1 | 0.08114 | 0.00227 | 2.12646 | 0.06154 | 0.19010 | 0.00430 | 1225 | 26 | 1157 | 20 | 1122 | 23 |
| XY20-02-05  | 145  | 603 | 751 | 0.2 | 0.07021 | 0.00203 | 1.51217 | 0.04510 | 0.15623 | 0.00353 | 935  | 29 | 935  | 18 | 936  | 20 |
| XY20-02-07  | 143  | 408 | 280 | 0.3 | 0.06925 | 0.00164 | 1.46217 | 0.03293 | 0.15318 | 0.00157 | 906  | 48 | 915  | 14 | 919  | 9  |

|             |      |      |      |     |         |         |         |         |         |         |      |     |      |    |      |    |
|-------------|------|------|------|-----|---------|---------|---------|---------|---------|---------|------|-----|------|----|------|----|
| XY20-02-11  | 215  | 361  | 262  | 0.6 | 0.06994 | 0.00273 | 1.50609 | 0.05713 | 0.15623 | 0.00217 | 927  | 78  | 933  | 23 | 936  | 12 |
| XY20-02-13  | 516  | 837  | 589  | 0.6 | 0.06987 | 0.00148 | 1.47805 | 0.02962 | 0.15348 | 0.00151 | 925  | 43  | 921  | 12 | 920  | 8  |
| XY20-02-14c | 206  | 423  | 419  | 0.5 | 0.08315 | 0.00216 | 2.48776 | 0.06206 | 0.21708 | 0.00250 | 1273 | 50  | 1269 | 18 | 1266 | 13 |
| XY20-02-16c | 118  | 234  | 237  | 0.5 | 0.08952 | 0.00317 | 3.05487 | 0.10513 | 0.24759 | 0.00363 | 1415 | 66  | 1422 | 26 | 1426 | 19 |
| XY20-02-17c | 156  | 436  | 356  | 0.4 | 0.08579 | 0.00316 | 2.45556 | 0.08776 | 0.20768 | 0.00303 | 1333 | 70  | 1259 | 26 | 1216 | 16 |
| XY20-02-19c | 159  | 342  | 256  | 0.5 | 0.07305 | 0.00207 | 1.67217 | 0.04558 | 0.16609 | 0.00191 | 1015 | 56  | 998  | 17 | 991  | 11 |
| XY20-02-20c | 92.6 | 393  | 298  | 0.2 | 0.08148 | 0.00363 | 2.22139 | 0.09635 | 0.19781 | 0.00326 | 1233 | 85  | 1188 | 30 | 1164 | 18 |
| XY20-02-21  | 108  | 353  | 242  | 0.3 | 0.07103 | 0.00234 | 1.51606 | 0.04842 | 0.15487 | 0.00193 | 958  | 66  | 937  | 20 | 928  | 11 |
| XY20-02-22c | 392  | 431  | 539  | 0.9 | 0.09340 | 0.00162 | 3.35710 | 0.05468 | 0.26078 | 0.00253 | 1496 | 32  | 1494 | 13 | 1494 | 13 |
| XY20-02-23c | 27.2 | 52.7 | 85.1 | 0.5 | 0.11556 | 0.00402 | 5.41503 | 0.18423 | 0.33997 | 0.00556 | 1889 | 61  | 1887 | 29 | 1887 | 27 |
|             |      |      |      |     |         |         |         |         |         |         |      |     |      |    |      |    |
| XY20-05-01  | 56.2 | 360  | 337  | 0.2 | 0.07650 | 0.00300 | 1.59787 | 0.06308 | 0.15150 | 0.00362 | 1108 | 77  | 969  | 25 | 909  | 20 |
| XY20-05-02  | 84.3 | 507  | 446  | 0.2 | 0.07020 | 0.00414 | 1.49322 | 0.08715 | 0.15430 | 0.00415 | 934  | 116 | 928  | 35 | 925  | 23 |
| XY20-05-03  | 60.8 | 431  | 337  | 0.1 | 0.07166 | 0.00324 | 1.51774 | 0.06859 | 0.15362 | 0.00378 | 976  | 90  | 938  | 28 | 921  | 21 |
| XY20-05-04c | 80.6 | 272  | 577  | 0.3 | 0.08721 | 0.00277 | 2.34353 | 0.07599 | 0.19492 | 0.00450 | 1365 | 60  | 1226 | 23 | 1148 | 24 |
| XY20-05-05c | 116  | 308  | 915  | 0.4 | 0.09072 | 0.00306 | 2.53091 | 0.08678 | 0.20236 | 0.00474 | 1441 | 63  | 1281 | 25 | 1188 | 25 |
| XY20-05-06  | 82.4 | 453  | 442  | 0.2 | 0.07005 | 0.00358 | 1.46616 | 0.07453 | 0.15183 | 0.00387 | 930  | 102 | 917  | 31 | 911  | 22 |
| XY20-05-07  | 96.8 | 418  | 307  | 0.2 | 0.07160 | 0.00361 | 1.58627 | 0.07789 | 0.16069 | 0.00268 | 975  | 99  | 965  | 31 | 961  | 15 |
| XY20-05-08c | 33.3 | 517  | 482  | 0.1 | 0.08992 | 0.00194 | 2.56901 | 0.05224 | 0.20724 | 0.00214 | 1424 | 41  | 1292 | 15 | 1214 | 11 |
| XY20-05-09c | 144  | 503  | 400  | 0.3 | 0.09021 | 0.00221 | 2.23873 | 0.05221 | 0.18000 | 0.00197 | 1430 | 46  | 1193 | 16 | 1067 | 11 |
| XY20-05-10  | 164  | 316  | 224  | 0.5 | 0.06986 | 0.00332 | 1.48053 | 0.06860 | 0.15371 | 0.00239 | 924  | 95  | 922  | 28 | 922  | 13 |
| XY20-05-11c | 158  | 433  | 330  | 0.4 | 0.07363 | 0.00255 | 1.76859 | 0.05931 | 0.17424 | 0.00225 | 1031 | 69  | 1034 | 22 | 1035 | 12 |
| XY20-05-12c | 110  | 294  | 257  | 0.4 | 0.08206 | 0.00399 | 2.40521 | 0.11421 | 0.21261 | 0.00377 | 1247 | 92  | 1244 | 34 | 1243 | 20 |
| XY20-05-13  | 75.1 | 345  | 232  | 0.2 | 0.06937 | 0.00200 | 1.45428 | 0.04028 | 0.15208 | 0.00169 | 910  | 58  | 912  | 17 | 913  | 9  |
| XY20-05-14c | 247  | 615  | 473  | 0.4 | 0.08489 | 0.00165 | 1.97877 | 0.03588 | 0.16909 | 0.00163 | 1313 | 37  | 1108 | 12 | 1007 | 9  |
| XY20-05-15  | 154  | 378  | 266  | 0.4 | 0.07024 | 0.00219 | 1.49653 | 0.04487 | 0.15455 | 0.00182 | 935  | 63  | 929  | 18 | 926  | 10 |
| XY20-05-16  | 157  | 440  | 309  | 0.4 | 0.06951 | 0.00174 | 1.46733 | 0.03509 | 0.15312 | 0.00159 | 914  | 51  | 917  | 14 | 918  | 9  |
| XY20-05-17c | 88.4 | 382  | 299  | 0.2 | 0.07542 | 0.00423 | 1.87710 | 0.10283 | 0.18055 | 0.00344 | 1080 | 109 | 1073 | 36 | 1070 | 19 |
| XY20-05-18c | 60.2 | 173  | 168  | 0.3 | 0.07904 | 0.00517 | 2.20760 | 0.14140 | 0.20260 | 0.00456 | 1173 | 124 | 1184 | 45 | 1189 | 24 |
| XY20-05-19c | 85.6 | 404  | 314  | 0.2 | 0.07644 | 0.00277 | 1.98538 | 0.06982 | 0.18840 | 0.00256 | 1107 | 71  | 1111 | 24 | 1113 | 14 |
| XY20-05-20  | 146  | 495  | 356  | 0.3 | 0.06993 | 0.00287 | 1.46263 | 0.05819 | 0.15173 | 0.00214 | 926  | 82  | 915  | 24 | 911  | 12 |
| XY20-05-22  | 108  | 366  | 282  | 0.3 | 0.08745 | 0.00213 | 1.90682 | 0.04414 | 0.15818 | 0.00170 | 1370 | 46  | 1084 | 15 | 947  | 9  |

|             |      |     |     |     |         |         |         |         |         |         |      |     |      |    |      |    |
|-------------|------|-----|-----|-----|---------|---------|---------|---------|---------|---------|------|-----|------|----|------|----|
| XY20-05-23c | 185  | 443 | 343 | 0.4 | 0.07691 | 0.00422 | 1.88979 | 0.10107 | 0.17825 | 0.00333 | 1119 | 106 | 1078 | 36 | 1057 | 18 |
| XY20-05-24  | 181  | 493 | 355 | 0.4 | 0.06917 | 0.00154 | 1.47707 | 0.03121 | 0.15490 | 0.00152 | 904  | 45  | 921  | 13 | 928  | 8  |
| XY20-07-08  | 77.1 | 403 | 282 | 0.2 | 0.07371 | 0.00220 | 1.57229 | 0.04431 | 0.15468 | 0.00297 | 1034 | 59  | 959  | 17 | 927  | 17 |
| XY20-07-10  | 79.3 | 298 | 217 | 0.3 | 0.07080 | 0.00243 | 1.50984 | 0.04940 | 0.15468 | 0.00305 | 952  | 69  | 934  | 20 | 927  | 17 |
| XY20-07-12  | 80.1 | 193 | 141 | 0.4 | 0.07000 | 0.00385 | 1.51021 | 0.08048 | 0.15651 | 0.00364 | 928  | 109 | 935  | 33 | 937  | 20 |
| XY20-07-14c | 118  | 184 | 145 | 0.6 | 0.07213 | 0.00269 | 1.65401 | 0.05881 | 0.16638 | 0.00333 | 990  | 74  | 991  | 23 | 992  | 18 |
| XY20-07-18  | 196  | 279 | 206 | 0.7 | 0.07092 | 0.00241 | 1.51963 | 0.04870 | 0.15549 | 0.00300 | 955  | 68  | 938  | 20 | 932  | 17 |
| XY20-07-19  | 123  | 471 | 321 | 0.3 | 0.07042 | 0.00221 | 1.51869 | 0.04451 | 0.15648 | 0.00293 | 941  | 63  | 938  | 18 | 937  | 16 |
| XY20-07-21  | 262  | 323 | 239 | 0.8 | 0.07051 | 0.00238 | 1.51213 | 0.04793 | 0.15561 | 0.00296 | 943  | 68  | 935  | 19 | 932  | 17 |
| XY20-07-22  | 120  | 412 | 281 | 0.3 | 0.07094 | 0.00295 | 1.51529 | 0.06008 | 0.15498 | 0.00316 | 956  | 83  | 937  | 24 | 929  | 18 |
| XY20-07-23  | 110  | 364 | 261 | 0.3 | 0.07210 | 0.00242 | 1.57287 | 0.04961 | 0.15826 | 0.00301 | 989  | 67  | 960  | 20 | 947  | 17 |
| XY20-07-24  | 62.3 | 223 | 153 | 0.3 | 0.07224 | 0.00325 | 1.52302 | 0.06545 | 0.15295 | 0.00321 | 993  | 89  | 940  | 26 | 918  | 18 |

**\*Postfix c denotes inherited zircon domain; the spots without postfix for the Magmatic zircon.**
