# Supplementary material
Source: MDPI journal article supplement (https://www.mdpi.com/2075-163X/12/7/910)
Supplement: s1 [file s1]

**Supplementary Table S4. SIMS zircon O isotope data for the early Neoproterozoic granitic rocks in the western margin of the NQT**

| <b>Spot</b> | <b><math>\delta^{18}\text{O}</math></b> | <b><math>2\sigma</math></b> |
|-------------|-----------------------------------------|-----------------------------|
| WS20-01-01  | 8.90                                    | 0.26                        |
| WS20-01-02  | 8.90                                    | 0.18                        |
| WS20-01-03  | 9.30                                    | 0.25                        |
| WS20-01-04  | 8.74                                    | 0.17                        |
| WS20-01-05  | 9.15                                    | 0.22                        |
| WS20-01-06  | 8.88                                    | 0.21                        |
| WS20-01-07  | 9.27                                    | 0.26                        |
| WS20-01-08  | 8.38                                    | 0.22                        |
| WS20-01-09  | 8.80                                    | 0.26                        |
| WS20-01-10  | 8.14                                    | 0.24                        |
| WS20-01-11  | 9.08                                    | 0.23                        |
| WS20-01-13  | 9.28                                    | 0.27                        |
| WS20-01-15  | 9.15                                    | 0.14                        |
| WS20-01-16  | 8.57                                    | 0.21                        |
| WS20-01-17  | 9.37                                    | 0.12                        |
| WS20-01-18  | 4.56                                    | 0.24                        |
| WS20-01-19  | 9.11                                    | 0.22                        |
| WS20-01-20  | 8.78                                    | 0.22                        |
| WS20-01-21  | 8.89                                    | 0.20                        |
| WS20-01-22  | 8.96                                    | 0.20                        |
| WS20-01-23  | 9.35                                    | 0.19                        |
| WS20-01-24  | 9.37                                    | 0.18                        |
|             |                                         |                             |
| WS20-02-01  | 9.72                                    | 0.20                        |
| WS20-02-02  | 11.07                                   | 0.19                        |
| WS20-02-03  | 8.40                                    | 0.25                        |
| WS20-02-04  | 8.79                                    | 0.20                        |
| WS20-02-05  | 9.08                                    | 0.18                        |
| WS20-02-06  | 9.10                                    | 0.20                        |
| WS20-02-09  | 9.47                                    | 0.18                        |
| WS20-02-10  | 8.01                                    | 0.27                        |
| WS20-02-11  | 9.00                                    | 0.17                        |
| WS20-02-12  | 8.35                                    | 0.24                        |
| WS20-02-14  | 9.35                                    | 0.23                        |
| WS20-02-16  | 9.56                                    | 0.20                        |
| WS20-02-18  | 8.42                                    | 0.24                        |
| WS20-02-19  | 6.64                                    | 0.19                        |
| WS20-02-20  | 5.96                                    | 0.26                        |
| WS20-02-21  | 8.96                                    | 0.24                        |

|            |       |      |
|------------|-------|------|
| WS20-02-23 | 8.88  | 0.22 |
| WS20-02-24 | 8.97  | 0.18 |
| WS20-03-01 | 8.25  | 0.32 |
| WS20-03-02 | 9.10  | 0.27 |
| WS20-03-03 | 9.02  | 0.23 |
| WS20-03-04 | 9.29  | 0.18 |
| WS20-03-05 | 8.82  | 0.28 |
| WS20-03-07 | 8.96  | 0.27 |
| WS20-03-08 | 8.90  | 0.21 |
| WS20-03-09 | 8.75  | 0.22 |
| WS20-03-11 | 9.14  | 0.22 |
| WS20-03-13 | 6.92  | 0.21 |
| WS20-03-14 | 8.88  | 0.13 |
| WS20-03-15 | 9.18  | 0.25 |
| WS20-03-16 | 9.22  | 0.25 |
| WS20-03-18 | 9.66  | 0.19 |
| WS20-03-20 | 8.95  | 0.20 |
| WS20-03-21 | 8.96  | 0.21 |
| WS20-03-22 | 8.41  | 0.32 |
| WS20-03-23 | 8.78  | 0.24 |
| WS20-03-24 | 8.94  | 0.18 |
| YL20-01-01 | 4.66  | 0.30 |
| YL20-01-04 | 6.99  | 0.33 |
| YL20-01-07 | 9.85  | 0.19 |
| YL20-01-08 | 9.38  | 0.24 |
| YL20-01-09 | 9.14  | 0.23 |
| YL20-01-10 | 7.74  | 0.26 |
| YL20-01-11 | 9.79  | 0.31 |
| YL20-01-13 | 7.96  | 0.34 |
| YL20-01-14 | 9.61  | 0.19 |
| YL20-01-15 | 9.76  | 0.27 |
| YL20-01-16 | 9.99  | 0.24 |
| YL20-01-17 | 4.73  | 0.45 |
| YL20-01-20 | 9.92  | 0.21 |
| YL20-01-21 | 10.94 | 0.18 |
| YL20-01-24 | 10.07 | 0.27 |
| YL20-02-02 | 7.08  | 0.22 |
| YL20-02-04 | 4.24  | 0.34 |
| YL20-02-05 | 10.26 | 0.29 |

|             |       |      |
|-------------|-------|------|
| YL20-02-06  | 9.64  | 0.22 |
| YL20-02-08  | 9.01  | 0.28 |
| YL20-02-09  | 9.27  | 0.26 |
| YL20-02-10  | 8.28  | 0.31 |
| YL20-02-11  | 8.10  | 0.19 |
| YL20-02-12  | 9.48  | 0.25 |
| YL20-02-13  | 9.48  | 0.18 |
| YL20-02-14  | 9.55  | 0.22 |
| YL20-02-16  | 9.04  | 0.30 |
| YL20-02-17  | 9.66  | 0.21 |
| YL20-02-18  | 9.41  | 0.35 |
| YL20-02-19  | 9.82  | 0.23 |
|             |       |      |
| YL20-03-01  | 9.81  | 0.21 |
| YL20-03-02  | 9.08  | 0.21 |
| YL20-03-05  | 9.43  | 0.21 |
| YL20-03-06  | 6.91  | 0.20 |
| YL20-03-07  | 9.84  | 0.19 |
| YL20-03-08  | 9.89  | 0.21 |
| YL20-03-09  | 9.66  | 0.19 |
| YL20-03-10  | 8.86  | 0.31 |
| YL20-03-11  | 10.47 | 0.26 |
| YL20-03-13  | 9.67  | 0.20 |
| YL20-03-14  | 8.94  | 0.25 |
| YL20-03-15  | 10.07 | 0.16 |
| YL20-03-16  | 9.09  | 0.23 |
| YL20-03-17  | 9.37  | 0.28 |
| YL20-03-18  | 9.79  | 0.28 |
| YL20-03-19  | 9.68  | 0.26 |
| YL20-03-20  | 9.85  | 0.33 |
| YL20-03-22  | 9.93  | 0.22 |
| YL20-03-23  | 9.81  | 0.21 |
|             |       |      |
| XY20-02-02  | 7.59  | 0.18 |
| XY20-02-03  | 9.20  | 0.21 |
| XY20-02-04c | 8.77  | 0.33 |
| XY20-02-05  | 7.59  | 0.14 |
| XY20-02-07  | 9.35  | 0.14 |
| XY20-02-11  | 8.78  | 0.47 |
| XY20-02-13  | 3.56  | 0.20 |
| XY20-02-14c | 6.06  | 0.14 |
| XY20-02-16c | 9.13  | 0.17 |

|             |       |      |
|-------------|-------|------|
| XY20-02-17c | 8.94  | 0.21 |
| XY20-02-19c | 8.73  | 0.18 |
| XY20-02-20c | 7.37  | 0.23 |
| XY20-02-21  | 8.58  | 0.22 |
| XY20-02-22c | 5.17  | 0.30 |
| XY20-02-23c | 7.37  | 0.25 |
| XY20-02-25  | 7.80  | 0.26 |
| XY20-02-26  | 7.52  | 0.15 |
| XY20-02-27  | 8.72  | 0.17 |
| XY20-02-28  | 8.53  | 0.14 |
| XY20-02-29  | 10.26 | 0.16 |
| XY20-02-30  | 7.18  | 0.21 |
| XY20-02-31  | 8.94  | 0.22 |
| XY20-02-32  | 8.68  | 0.22 |
| XY20-02-33  | 7.72  | 0.28 |
| XY20-02-34  | 8.56  | 0.22 |
| XY20-02-35  | 8.67  | 0.23 |
|             |       |      |
| XY20-05-01  | 9.82  | 0.28 |
| XY20-05-02  | 9.90  | 0.26 |
| XY20-05-03  | 9.92  | 0.17 |
| XY20-05-04c | 9.13  | 0.38 |
| XY20-05-05c | 10.49 | 0.23 |
| XY20-05-06  | 9.15  | 0.24 |
| XY20-05-07  | 8.65  | 0.40 |
| XY20-05-08c | 8.90  | 0.23 |
| XY20-05-09c | 4.73  | 0.23 |
| XY20-05-10  | 9.94  | 0.29 |
| XY20-05-11c | 9.25  | 0.22 |
| XY20-05-12c | 7.84  | 0.37 |
| XY20-05-13  | 9.25  | 0.22 |
| XY20-05-14c | 6.31  | 0.26 |
| XY20-05-15  | 8.99  | 0.24 |
| XY20-05-16  | 4.62  | 0.91 |
| XY20-05-17c | 9.35  | 0.28 |
| XY20-05-18c | 8.56  | 0.29 |
| XY20-05-19c | 8.15  | 0.28 |
| XY20-05-20  | 9.06  | 0.28 |
| XY20-05-22  | 9.45  | 0.34 |
| XY20-05-23c | 9.04  | 0.19 |
| XY20-05-24  | 9.43  | 0.24 |
| XY20-05-25  | 8.94  | 0.23 |

|             |       |      |
|-------------|-------|------|
| XY20-05-26  | 9.50  | 0.22 |
| XY20-05-27  | 10.01 | 0.22 |
| XY20-05-28  | 8.87  | 0.24 |
| XY20-05-29  | 8.76  | 0.19 |
| XY20-05-30  | 7.83  | 0.18 |
| XY20-05-31  | 9.68  | 0.22 |
| XY20-05-32  | 9.29  | 0.21 |
| XY20-05-33  | 6.81  | 0.23 |
| XY20-05-34  | 8.62  | 0.25 |
| XY20-05-35  | 9.09  | 0.18 |
|             |       |      |
| XY20-07-08  | 8.93  | 0.28 |
| XY20-07-10  | 6.06  | 0.28 |
| XY20-07-12  | 6.73  | 0.29 |
| XY20-07-14c | 9.61  | 0.31 |
| XY20-07-18  | 9.73  | 0.26 |
| XY20-07-19  | 10.38 | 0.26 |
| XY20-07-21  | 9.39  | 0.22 |
| XY20-07-22  | 9.03  | 0.20 |
| XY20-07-23  | 9.00  | 0.18 |
| XY20-07-24  | 9.12  | 0.28 |
| XY20-07-25  | 10.06 | 0.22 |
| XY20-07-26  | 9.31  | 0.21 |
| XY20-07-27  | 8.81  | 0.22 |
| XY20-07-28  | 8.50  | 0.22 |
| XY20-07-29  | 9.71  | 0.30 |
| XY20-07-30  | 9.60  | 0.24 |
| XY20-07-31  | 9.61  | 0.27 |
| XY20-07-32  | 7.63  | 0.26 |
| XY20-07-33  | 9.85  | 0.26 |
| XY20-07-34  | 9.19  | 0.31 |
| XY20-07-35  | 7.71  | 0.17 |
| XY20-07-36  | 6.99  | 0.25 |
| XY20-07-37  | 10.33 | 0.18 |

---

**\*Postfix c denotes inherited zircon domain; others are magmatic zircons.**
