# Supplementary material
Source: MDPI journal article supplement (https://www.mdpi.com/2075-163X/12/7/910)
Supplement: s1 [file s1]

**Supplementary Table S3. LA-MCICPMS zircon Lu-Hf isotope data for the early Neoproterozoic granitic rocks in the western margin of the NQT**

| Spot       | $^{176}\text{Yb}/^{177}\text{Hf}$ | 2SE      | $^{176}\text{Lu}/^{177}\text{Hf}$ | 2SE      | $^{176}\text{Hf}/^{177}\text{Hf}$ | 2 $\sigma$ | $\varepsilon_{\text{Hf}}(0)$ | $\varepsilon_{\text{Hf}}(t)$ | 2 $\sigma$ | T <sub>DM1</sub> | T <sub>DM2</sub> | 2 $\sigma$ | f <sub>Lu/Hf</sub> |
|------------|-----------------------------------|----------|-----------------------------------|----------|-----------------------------------|------------|------------------------------|------------------------------|------------|------------------|------------------|------------|--------------------|
| WS20-01-01 | 0.044998                          | 0.000849 | 0.001247                          | 0.000021 | 0.282189                          | 0.000015   | -20.6                        | -1.2                         | 1.3        | 1508             | 1673             | 21         | -0.96              |
| WS20-01-02 | 0.059751                          | 0.001091 | 0.001698                          | 0.000054 | 0.282135                          | 0.000024   | -22.5                        | -3.0                         | 1.4        | 1603             | 1778             | 34         | -0.95              |
| WS20-01-03 | 0.039180                          | 0.000725 | 0.001062                          | 0.000014 | 0.282176                          | 0.000014   | -21.1                        | -1.1                         | 1.2        | 1519             | 1684             | 20         | -0.97              |
| WS20-01-04 | 0.057276                          | 0.000546 | 0.001573                          | 0.000016 | 0.282208                          | 0.000018   | -19.9                        | 0.5                          | 1.3        | 1495             | 1633             | 26         | -0.95              |
| WS20-01-05 | 0.049210                          | 0.000650 | 0.001326                          | 0.000010 | 0.282205                          | 0.000017   | -20.0                        | -0.9                         | 1.3        | 1489             | 1648             | 25         | -0.96              |
| WS20-01-06 | 0.041836                          | 0.000879 | 0.001227                          | 0.000026 | 0.282162                          | 0.000016   | -21.6                        | -2.2                         | 1.3        | 1545             | 1721             | 23         | -0.96              |
| WS20-01-07 | 0.045402                          | 0.000618 | 0.001263                          | 0.000017 | 0.282163                          | 0.000014   | -21.5                        | -1.5                         | 1.2        | 1545             | 1711             | 20         | -0.96              |
| WS20-01-08 | 0.055209                          | 0.001971 | 0.001577                          | 0.000062 | 0.282146                          | 0.000019   | -22.1                        | -2.7                         | 1.3        | 1583             | 1756             | 27         | -0.95              |
| WS20-01-09 | 0.044079                          | 0.001786 | 0.001223                          | 0.000039 | 0.282189                          | 0.000016   | -20.6                        | -1.2                         | 1.2        | 1507             | 1672             | 22         | -0.96              |
| WS20-01-10 | 0.082996                          | 0.001590 | 0.002250                          | 0.000032 | 0.282200                          | 0.000019   | -20.2                        | -1.0                         | 1.3        | 1534             | 1679             | 27         | -0.93              |
| WS20-01-11 | 0.043587                          | 0.001101 | 0.001186                          | 0.000026 | 0.282133                          | 0.000017   | -22.6                        | -2.9                         | 1.3        | 1584             | 1767             | 24         | -0.96              |
| WS20-01-13 | 0.039901                          | 0.000681 | 0.001085                          | 0.000024 | 0.282173                          | 0.000016   | -21.2                        | -1.2                         | 1.2        | 1524             | 1689             | 22         | -0.97              |
| WS20-01-15 | 0.061216                          | 0.000976 | 0.001667                          | 0.000032 | 0.282172                          | 0.000016   | -21.2                        | -1.7                         | 1.2        | 1549             | 1711             | 23         | -0.95              |
| WS20-01-16 | 0.047948                          | 0.000740 | 0.001318                          | 0.000023 | 0.282202                          | 0.000017   | -20.2                        | -0.4                         | 1.3        | 1493             | 1647             | 24         | -0.96              |
| WS20-01-17 | 0.062516                          | 0.001432 | 0.001645                          | 0.000051 | 0.282221                          | 0.000015   | -19.5                        | 0.1                          | 1.2        | 1479             | 1622             | 22         | -0.95              |
| WS20-01-18 | 0.040309                          | 0.000315 | 0.001103                          | 0.000006 | 0.282148                          | 0.000018   | -22.1                        | -2.3                         | 1.3        | 1560             | 1738             | 24         | -0.97              |
| WS20-01-19 | 0.039421                          | 0.000604 | 0.001048                          | 0.000009 | 0.282152                          | 0.000015   | -21.9                        | -1.7                         | 1.2        | 1552             | 1724             | 21         | -0.97              |
| WS20-01-20 | 0.040396                          | 0.000334 | 0.001099                          | 0.000002 | 0.282154                          | 0.000015   | -21.9                        | -1.8                         | 1.2        | 1551             | 1724             | 21         | -0.97              |
| WS20-01-21 | 0.045711                          | 0.000722 | 0.001226                          | 0.000012 | 0.282166                          | 0.000016   | -21.4                        | -1.1                         | 1.2        | 1539             | 1701             | 22         | -0.96              |
| WS20-01-22 | 0.064282                          | 0.001242 | 0.001796                          | 0.000023 | 0.282197                          | 0.000015   | -20.3                        | -0.5                         | 1.2        | 1519             | 1665             | 22         | -0.95              |
| WS20-01-23 | 0.041828                          | 0.000438 | 0.001131                          | 0.000007 | 0.282195                          | 0.000017   | -20.4                        | -0.7                         | 1.2        | 1496             | 1656             | 23         | -0.97              |
| WS20-01-24 | 0.052125                          | 0.001778 | 0.001445                          | 0.000053 | 0.282208                          | 0.000014   | -19.9                        | 0.3                          | 1.2        | 1489             | 1632             | 20         | -0.96              |
|            |                                   |          |                                   |          |                                   |            |                              |                              |            |                  |                  |            |                    |
| WS20-02-01 | 0.019802                          | 0.001347 | 0.000546                          | 0.000038 | 0.281935                          | 0.000024   | -29.6                        | -9.2                         | 1.4        | 1829             | 2096             | 33         | -0.98              |
| WS20-02-02 | 0.010640                          | 0.000530 | 0.000263                          | 0.000015 | 0.282071                          | 0.000019   | -24.8                        | -4.3                         | 1.3        | 1630             | 1845             | 25         | -0.99              |
| WS20-02-03 | 0.054511                          | 0.000649 | 0.001496                          | 0.000010 | 0.282201                          | 0.000017   | -20.2                        | -0.3                         | 1.3        | 1501             | 1650             | 25         | -0.95              |
| WS20-02-04 | 0.044787                          | 0.000284 | 0.001233                          | 0.000006 | 0.282181                          | 0.000017   | -20.9                        | -1.1                         | 1.3        | 1519             | 1681             | 24         | -0.96              |
| WS20-02-05 | 0.032183                          | 0.001375 | 0.000955                          | 0.000049 | 0.282165                          | 0.000018   | -21.5                        | -1.9                         | 1.3        | 1530             | 1706             | 25         | -0.97              |
| WS20-02-06 | 0.009920                          | 0.001080 | 0.000258                          | 0.000033 | 0.282095                          | 0.000015   | -23.9                        | -3.8                         | 1.2        | 1598             | 1808             | 20         | -0.99              |
| WS20-02-09 | 0.020305                          | 0.000479 | 0.000603                          | 0.000018 | 0.282159                          | 0.000015   | -21.7                        | -1.8                         | 1.2        | 1524             | 1705             | 21         | -0.98              |
| WS20-02-10 | 0.055893                          | 0.000562 | 0.001674                          | 0.000028 | 0.282177                          | 0.000017   | -21.0                        | -1.8                         | 1.3        | 1542             | 1705             | 25         | -0.95              |
| WS20-02-11 | 0.131943                          | 0.009957 | 0.003671                          | 0.000271 | 0.282177                          | 0.000023   | -21.0                        | -3.1                         | 1.4        | 1630             | 1768             | 34         | -0.89              |
| WS20-02-12 | 0.027027                          | 0.000676 | 0.000780                          | 0.000017 | 0.282164                          | 0.000014   | -21.5                        | -1.1                         | 1.2        | 1525             | 1694             | 20         | -0.98              |
| WS20-02-14 | 0.044870                          | 0.000571 | 0.001300                          | 0.000021 | 0.282174                          | 0.000016   | -21.1                        | -1.2                         | 1.2        | 1531             | 1693             | 22         | -0.96              |
| WS20-02-16 | 0.034439                          | 0.000841 | 0.000942                          | 0.000017 | 0.282171                          | 0.000018   | -21.2                        | -1.3                         | 1.3        | 1521             | 1689             | 25         | -0.97              |
| WS20-02-18 | 0.036234                          | 0.000425 | 0.001038                          | 0.000011 | 0.282184                          | 0.000016   | -20.8                        | -0.3                         | 1.2        | 1507             | 1663             | 22         | -0.97              |
| WS20-02-19 | 0.050609                          | 0.000405 | 0.001428                          | 0.000010 | 0.282163                          | 0.000015   | -21.5                        | -1.8                         | 1.2        | 1552             | 1718             | 22         | -0.96              |
| WS20-02-20 | 0.041706                          | 0.000199 | 0.001191                          | 0.000005 | 0.282198                          | 0.000015   | -20.3                        | -0.7                         | 1.2        | 1494             | 1652             | 21         | -0.96              |
| WS20-02-21 | 0.036590                          | 0.000312 | 0.001038                          | 0.000004 | 0.282096                          | 0.000016   | -23.9                        | -3.4                         | 1.2        | 1629             | 1818             | 23         | -0.97              |
| WS20-02-23 | 0.039323                          | 0.000730 | 0.001081                          | 0.000014 | 0.282130                          | 0.000016   | -22.7                        | -2.9                         | 1.2        | 1584             | 1769             | 22         | -0.97              |
| WS20-02-24 | 0.051515                          | 0.000833 | 0.001401                          | 0.000013 | 0.282174                          | 0.000019   | -21.1                        | -1.8                         | 1.3        | 1535             | 1703             | 26         | -0.96              |
|            |                                   |          |                                   |          |                                   |            |                              |                              |            |                  |                  |            |                    |
| WS20-03-01 | 0.089050                          | 0.001390 | 0.002468                          | 0.000034 | 0.282289                          | 0.000021   | -17.1                        | 2.1                          | 1.4        | 1413             | 1525             | 31         | -0.93              |
| WS20-03-02 | 0.048806                          | 0.000498 | 0.001337                          | 0.000009 | 0.282149                          | 0.000018   | -22.0                        | -1.9                         | 1.3        | 1569             | 1738             | 25         | -0.96              |

|            |          |          |          |          |          |          |       |       |     |      |      |    |       |
|------------|----------|----------|----------|----------|----------|----------|-------|-------|-----|------|------|----|-------|
| WS20-03-03 | 0.046626 | 0.000949 | 0.001283 | 0.000021 | 0.282213 | 0.000016 | -19.8 | -0.3  | 1.3 | 1476 | 1628 | 23 | -0.96 |
| WS20-03-04 | 0.046527 | 0.000934 | 0.001276 | 0.000019 | 0.282178 | 0.000018 | -21.0 | -1.2  | 1.3 | 1524 | 1687 | 25 | -0.96 |
| WS20-03-05 | 0.043771 | 0.000467 | 0.001205 | 0.000008 | 0.282229 | 0.000015 | -19.2 | 0.8   | 1.3 | 1450 | 1591 | 21 | -0.96 |
| WS20-03-07 | 0.043312 | 0.000471 | 0.001180 | 0.000016 | 0.282134 | 0.000016 | -22.6 | -3.5  | 1.2 | 1582 | 1773 | 22 | -0.96 |
| WS20-03-08 | 0.045588 | 0.000308 | 0.001250 | 0.000011 | 0.282185 | 0.000014 | -20.8 | -1.1  | 1.2 | 1514 | 1676 | 20 | -0.96 |
| WS20-03-09 | 0.060830 | 0.000751 | 0.001632 | 0.000026 | 0.282164 | 0.000016 | -21.5 | -2.8  | 1.2 | 1559 | 1734 | 23 | -0.95 |
| WS20-03-11 | 0.050302 | 0.000910 | 0.001367 | 0.000014 | 0.282184 | 0.000016 | -20.8 | -1.5  | 1.2 | 1520 | 1685 | 26 | -0.96 |
| WS20-03-14 | 0.041075 | 0.000303 | 0.001123 | 0.000006 | 0.282174 | 0.000017 | -21.2 | -0.8  | 1.2 | 1524 | 1685 | 34 | -0.97 |
| WS20-03-15 | 0.015169 | 0.001369 | 0.000384 | 0.000035 | 0.282166 | 0.000014 | -21.4 | -1.7  | 1.2 | 1506 | 1691 | 20 | -0.99 |
| WS20-03-16 | 0.041327 | 0.000270 | 0.001162 | 0.000007 | 0.282216 | 0.000017 | -19.7 | 0.3   | 1.2 | 1467 | 1615 | 23 | -0.96 |
| WS20-03-18 | 0.121378 | 0.006564 | 0.003230 | 0.000163 | 0.282216 | 0.000024 | -19.6 | -0.9  | 1.2 | 1551 | 1679 | 22 | -0.90 |
| WS20-03-20 | 0.043276 | 0.000470 | 0.001161 | 0.000011 | 0.282220 | 0.000015 | -19.5 | 0.8   | 1.2 | 1462 | 1604 | 35 | -0.97 |
| WS20-03-21 | 0.043485 | 0.000301 | 0.001195 | 0.000005 | 0.282216 | 0.000017 | -19.7 | 0.1   | 1.2 | 1468 | 1619 | 21 | -0.96 |
| WS20-03-22 | 0.040148 | 0.000631 | 0.001126 | 0.000012 | 0.282000 | 0.000024 | -27.3 | -6.9  | 1.4 | 1767 | 1994 | 34 | -0.97 |
| WS20-03-23 | 0.040048 | 0.000855 | 0.001130 | 0.000027 | 0.282235 | 0.000015 | -19.0 | 0.8   | 1.2 | 1440 | 1583 | 22 | -0.97 |
| WS20-03-24 | 0.047439 | 0.000340 | 0.001299 | 0.000007 | 0.282176 | 0.000016 | -21.1 | -1.1  | 1.2 | 1529 | 1689 | 23 | -0.96 |
| YL20-01-01 | 0.046332 | 0.000611 | 0.001401 | 0.000021 | 0.282102 | 0.000019 | -23.7 | -3.4  | 1.3 | 1636 | 1819 | 27 | -0.96 |
| YL20-01-04 | 0.055239 | 0.000757 | 0.001912 | 0.000027 | 0.282013 | 0.000023 | -26.8 | -7.4  | 1.4 | 1786 | 2001 | 33 | -0.94 |
| YL20-01-07 | 0.050854 | 0.001988 | 0.001361 | 0.000055 | 0.282163 | 0.000016 | -21.5 | -1.3  | 1.2 | 1549 | 1711 | 22 | -0.96 |
| YL20-01-08 | 0.053905 | 0.000580 | 0.001445 | 0.000015 | 0.282219 | 0.000018 | -19.6 | 0.1   | 1.3 | 1475 | 1621 | 26 | -0.96 |
| YL20-01-09 | 0.008402 | 0.001085 | 0.000212 | 0.000028 | 0.282118 | 0.000016 | -23.1 | -2.8  | 1.2 | 1564 | 1763 | 22 | -0.99 |
| YL20-01-10 | 0.022109 | 0.000802 | 0.000588 | 0.000021 | 0.282158 | 0.000015 | -21.7 | -1.5  | 1.2 | 1525 | 1703 | 21 | -0.98 |
| YL20-01-11 | 0.048257 | 0.003571 | 0.001251 | 0.000091 | 0.282238 | 0.000017 | -18.9 | 1.0   | 1.3 | 1440 | 1579 | 24 | -0.96 |
| YL20-01-13 | 0.006496 | 0.000576 | 0.000142 | 0.000013 | 0.282071 | 0.000015 | -24.8 | -4.5  | 1.2 | 1626 | 1845 | 20 | -1.00 |
| YL20-01-14 | 0.018239 | 0.000372 | 0.000488 | 0.000012 | 0.282186 | 0.000016 | -20.7 | 0.0   | 1.2 | 1483 | 1644 | 22 | -0.99 |
| YL20-01-15 | 0.021823 | 0.001978 | 0.000561 | 0.000051 | 0.282194 | 0.000017 | -20.4 | -0.1  | 1.2 | 1474 | 1635 | 23 | -0.98 |
| YL20-01-16 | 0.015458 | 0.000664 | 0.000390 | 0.000014 | 0.282116 | 0.000013 | -23.2 | -2.5  | 1.2 | 1575 | 1766 | 18 | -0.99 |
| YL20-01-17 | 0.020039 | 0.001022 | 0.000446 | 0.000023 | 0.282151 | 0.000016 | -22.0 | -1.4  | 1.2 | 1529 | 1706 | 22 | -0.99 |
| YL20-01-20 | 0.017371 | 0.000892 | 0.000455 | 0.000024 | 0.282143 | 0.000018 | -22.2 | -1.5  | 1.3 | 1540 | 1718 | 24 | -0.99 |
| YL20-01-21 | 0.022901 | 0.001342 | 0.000595 | 0.000036 | 0.282151 | 0.000016 | -22.0 | -1.8  | 1.2 | 1535 | 1716 | 22 | -0.98 |
| YL20-01-24 | 0.050503 | 0.001543 | 0.001401 | 0.000039 | 0.282251 | 0.000020 | -18.4 | 1.2   | 1.3 | 1427 | 1562 | 28 | -0.96 |
| YL20-02-02 | 0.023675 | 0.000859 | 0.000681 | 0.000035 | 0.282101 | 0.000019 | -23.7 | -4.6  | 1.3 | 1607 | 1820 | 26 | -0.98 |
| YL20-02-4  | 0.018913 | 0.000270 | 0.000536 | 0.000007 | 0.282039 | 0.000017 | -25.9 | -5.2  | 1.3 | 1686 | 1906 | 24 | -0.98 |
| YL20-02-5  | 0.005824 | 0.000150 | 0.000135 | 0.000003 | 0.282100 | 0.000016 | -23.8 | -3.3  | 1.3 | 1586 | 1791 | 22 | -1.00 |
| YL20-02-6  | 0.026473 | 0.001519 | 0.000666 | 0.000036 | 0.282151 | 0.000014 | -22.0 | -2.0  | 1.2 | 1538 | 1720 | 19 | -0.98 |
| YL20-02-8  | 0.037484 | 0.002628 | 0.000983 | 0.000067 | 0.282106 | 0.000015 | -23.6 | -4.3  | 1.2 | 1613 | 1817 | 21 | -0.97 |
| YL20-02-09 | 0.044362 | 0.002598 | 0.001161 | 0.000070 | 0.282186 | 0.000015 | -20.7 | -1.3  | 1.2 | 1509 | 1676 | 22 | -0.97 |
| YL20-02-10 | 0.049398 | 0.004373 | 0.001314 | 0.000120 | 0.282178 | 0.000018 | -21.0 | -1.4  | 1.3 | 1526 | 1691 | 25 | -0.96 |
| YL20-02-11 | 0.065280 | 0.002307 | 0.001712 | 0.000056 | 0.282209 | 0.000019 | -19.9 | -0.7  | 1.3 | 1499 | 1651 | 28 | -0.95 |
| YL20-02-12 | 0.041022 | 0.004074 | 0.000981 | 0.000096 | 0.282145 | 0.000015 | -22.2 | -2.1  | 1.2 | 1558 | 1736 | 21 | -0.97 |
| YL20-02-13 | 0.028943 | 0.001566 | 0.000761 | 0.000045 | 0.282134 | 0.000016 | -22.6 | -2.7  | 1.2 | 1565 | 1754 | 22 | -0.98 |
| YL20-02-14 | 0.098441 | 0.002636 | 0.002598 | 0.000066 | 0.282254 | 0.000017 | -18.3 | 0.4   | 1.3 | 1469 | 1596 | 25 | -0.92 |
| YL20-02-16 | 0.021276 | 0.001544 | 0.000574 | 0.000046 | 0.281874 | 0.000033 | -31.7 | -10.6 | 1.6 | 1914 | 2194 | 45 | -0.98 |
| YL20-02-17 | 0.034115 | 0.002978 | 0.000871 | 0.000077 | 0.282184 | 0.000018 | -20.8 | -1.3  | 1.3 | 1500 | 1671 | 24 | -0.97 |
| YL20-02-18 | 0.026846 | 0.002346 | 0.000724 | 0.000067 | 0.282129 | 0.000015 | -22.7 | -2.8  | 1.2 | 1570 | 1760 | 21 | -0.98 |

|             |          |          |          |          |          |          |       |       |     |      |      |    |       |
|-------------|----------|----------|----------|----------|----------|----------|-------|-------|-----|------|------|----|-------|
| YL20-02-19  | 0.054424 | 0.001152 | 0.001425 | 0.000027 | 0.282174 | 0.000017 | -21.1 | -1.5  | 1.2 | 1536 | 1699 | 24 | -0.96 |
| YL20-02-20  | 0.011302 | 0.000573 | 0.000259 | 0.000012 | 0.282137 | 0.000014 | -22.5 | -2.1  | 1.2 | 1540 | 1730 | 19 | -0.99 |
| YL20-02-21  | 0.022213 | 0.000934 | 0.000562 | 0.000027 | 0.282158 | 0.000015 | -21.7 | -1.5  | 1.2 | 1525 | 1703 | 21 | -0.98 |
| YL20-02-22  | 0.038782 | 0.001441 | 0.001047 | 0.000041 | 0.282139 | 0.000016 | -22.4 | -2.1  | 1.2 | 1570 | 1745 | 22 | -0.97 |
| YL20-02-23  | 0.042704 | 0.003192 | 0.001127 | 0.000091 | 0.282215 | 0.000016 | -19.7 | -0.2  | 1.2 | 1467 | 1621 | 23 | -0.97 |
| YL20-03-01  | 0.029646 | 0.002083 | 0.000878 | 0.000063 | 0.282106 | 0.000017 | -23.6 | -3.7  | 1.3 | 1609 | 1807 | 23 | -0.97 |
| YL20-03-02  | 0.031782 | 0.000463 | 0.000911 | 0.000012 | 0.282155 | 0.000016 | -21.8 | -1.8  | 1.3 | 1542 | 1717 | 22 | -0.97 |
| YL20-03-05  | 0.047046 | 0.003746 | 0.001294 | 0.000107 | 0.282170 | 0.000016 | -21.3 | -2.0  | 1.3 | 1537 | 1709 | 23 | -0.96 |
| YL20-03-06  | 0.035886 | 0.002010 | 0.000915 | 0.000045 | 0.282159 | 0.000016 | -21.7 | -1.9  | 1.3 | 1537 | 1714 | 22 | -0.97 |
| YL20-03-07  | 0.015158 | 0.000326 | 0.000406 | 0.000007 | 0.282170 | 0.000014 | -21.3 | -1.0  | 1.2 | 1501 | 1676 | 19 | -0.99 |
| YL20-03-08  | 0.043819 | 0.002604 | 0.001199 | 0.000069 | 0.282244 | 0.000018 | -18.7 | 1.2   | 1.3 | 1430 | 1568 | 26 | -0.96 |
| YL20-03-09  | 0.014796 | 0.000352 | 0.000405 | 0.000010 | 0.282119 | 0.000014 | -23.1 | -2.6  | 1.2 | 1571 | 1764 | 19 | -0.99 |
| YL20-03-10  | 0.016095 | 0.000381 | 0.000437 | 0.000008 | 0.282162 | 0.000014 | -21.6 | -1.7  | 1.2 | 1514 | 1697 | 19 | -0.99 |
| YL20-03-11  | 0.031378 | 0.001399 | 0.000852 | 0.000037 | 0.282136 | 0.000014 | -22.5 | -2.4  | 1.2 | 1566 | 1749 | 20 | -0.97 |
| YL20-03-13  | 0.026043 | 0.001239 | 0.000694 | 0.000036 | 0.282215 | 0.000016 | -19.7 | 0.4   | 1.2 | 1450 | 1604 | 22 | -0.98 |
| YL20-03-14  | 0.040105 | 0.000960 | 0.001110 | 0.000029 | 0.282085 | 0.000017 | -24.3 | -3.8  | 1.2 | 1648 | 1841 | 23 | -0.97 |
| YL20-03-15  | 0.038390 | 0.001086 | 0.001058 | 0.000037 | 0.282046 | 0.000017 | -25.7 | -5.6  | 1.3 | 1700 | 1915 | 24 | -0.97 |
| YL20-03-16  | 0.027720 | 0.000783 | 0.000720 | 0.000017 | 0.282157 | 0.000015 | -21.8 | -1.4  | 1.2 | 1532 | 1705 | 21 | -0.98 |
| YL20-03-17  | 0.063540 | 0.001910 | 0.001725 | 0.000054 | 0.282189 | 0.000016 | -20.6 | -1.3  | 1.2 | 1528 | 1685 | 23 | -0.95 |
| YL20-03-18  | 0.014840 | 0.000404 | 0.000385 | 0.000010 | 0.282098 | 0.000015 | -23.9 | -3.0  | 1.2 | 1600 | 1797 | 21 | -0.99 |
| YL20-03-19  | 0.062252 | 0.003257 | 0.001758 | 0.000100 | 0.282228 | 0.000017 | -19.2 | 0.4   | 1.2 | 1474 | 1613 | 24 | -0.95 |
| YL20-03-20  | 0.034162 | 0.002344 | 0.000927 | 0.000063 | 0.282190 | 0.000016 | -20.6 | 0.1   | 1.2 | 1494 | 1647 | 22 | -0.97 |
| YL20-03-22  | 0.005661 | 0.000170 | 0.000149 | 0.000004 | 0.282125 | 0.000013 | -22.9 | -2.1  | 1.2 | 1553 | 1744 | 18 | -1.00 |
| YL20-03-23  | 0.047210 | 0.001287 | 0.001270 | 0.000041 | 0.282153 | 0.000015 | -21.9 | -1.8  | 1.2 | 1559 | 1728 | 21 | -0.96 |
| XY20-02-02  | 0.101510 | 0.004320 | 0.002605 | 0.000109 | 0.282161 | 0.000019 | -21.6 | -2.6  | 1.3 | 1606 | 1760 | 27 | -0.92 |
| XY20-02-03  | 0.059506 | 0.002399 | 0.001712 | 0.000088 | 0.282252 | 0.000020 | -18.4 | 1.0   | 1.3 | 1438 | 1571 | 28 | -0.95 |
| XY20-02-04c | 0.005302 | 0.001302 | 0.000135 | 0.000034 | 0.281729 | 0.000019 | -36.9 | -12.2 | 1.3 | 2088 | 2391 | 26 | -1.00 |
| XY20-02-05  | 0.045235 | 0.000331 | 0.001205 | 0.000006 | 0.282205 | 0.000014 | -20.1 | -0.1  | 1.2 | 1484 | 1636 | 19 | -0.96 |
| XY20-02-07  | 0.037919 | 0.000323 | 0.001004 | 0.000012 | 0.282111 | 0.000016 | -23.4 | -3.7  | 1.2 | 1607 | 1802 | 22 | -0.97 |
| XY20-02-11  | 0.066515 | 0.002660 | 0.001785 | 0.000080 | 0.282188 | 0.000014 | -20.6 | -1.1  | 1.2 | 1531 | 1684 | 20 | -0.95 |
| XY20-02-13  | 0.105347 | 0.001877 | 0.002814 | 0.000055 | 0.282285 | 0.000019 | -17.2 | 1.4   | 1.2 | 1433 | 1547 | 28 | -0.92 |
| XY20-02-14c | 0.088862 | 0.000514 | 0.002386 | 0.000020 | 0.282142 | 0.000015 | -22.3 | 3.8   | 1.2 | 1623 | 1707 | 22 | -0.93 |
| XY20-02-16c | 0.031674 | 0.002768 | 0.000884 | 0.000075 | 0.282110 | 0.000016 | -23.4 | 7.4   | 1.3 | 1604 | 1655 | 22 | -0.97 |
| XY20-02-17c | 0.043499 | 0.000712 | 0.001139 | 0.000017 | 0.282182 | 0.000014 | -20.9 | 5.2   | 1.2 | 1513 | 1596 | 20 | -0.97 |
| XY20-02-19c | 0.053554 | 0.000504 | 0.001427 | 0.000011 | 0.282186 | 0.000016 | -20.7 | 0.2   | 1.2 | 1520 | 1662 | 22 | -0.96 |
| XY20-02-20c | 0.039636 | 0.000526 | 0.001063 | 0.000016 | 0.282174 | 0.000015 | -21.2 | 3.8   | 1.2 | 1522 | 1623 | 21 | -0.97 |
| XY20-02-21  | 0.044412 | 0.000496 | 0.001203 | 0.000018 | 0.282204 | 0.000017 | -20.1 | -0.3  | 1.2 | 1485 | 1640 | 24 | -0.96 |
| XY20-02-22c | 0.043497 | 0.000847 | 0.001227 | 0.000032 | 0.282142 | 0.000022 | -22.3 | 9.7   | 1.3 | 1573 | 1595 | 31 | -0.96 |
| XY20-02-23c | 0.016476 | 0.000556 | 0.000463 | 0.000013 | 0.281501 | 0.000016 | -45.0 | -3.5  | 1.3 | 2414 | 2574 | 22 | -0.99 |
| XY20-05-01  | 0.008112 | 0.000695 | 0.000230 | 0.000023 | 0.282086 | 0.000018 | -24.3 | -4.3  | 1.3 | 1609 | 1826 | 24 | -0.99 |
| XY20-05-02  | 0.053313 | 0.000281 | 0.001381 | 0.000007 | 0.282222 | 0.000015 | -19.5 | 0.1   | 1.3 | 1467 | 1614 | 22 | -0.96 |
| XY20-05-03  | 0.010985 | 0.000419 | 0.000251 | 0.000010 | 0.282106 | 0.000017 | -23.6 | -3.4  | 1.3 | 1583 | 1788 | 23 | -0.99 |
| XY20-05-04c | 0.018291 | 0.002137 | 0.000483 | 0.000055 | 0.282021 | 0.000015 | -26.6 | -1.5  | 1.3 | 1709 | 1878 | 21 | -0.99 |
| XY20-05-05c | 0.042167 | 0.001446 | 0.001180 | 0.000040 | 0.282072 | 0.000017 | -24.7 | 0.7   | 1.3 | 1668 | 1802 | 24 | -0.96 |

|             |          |          |          |          |          |          |       |      |     |      |      |    |       |
|-------------|----------|----------|----------|----------|----------|----------|-------|------|-----|------|------|----|-------|
| XY20-05-06  | 0.059993 | 0.000910 | 0.001519 | 0.000027 | 0.282194 | 0.000014 | -20.4 | -1.2 | 1.2 | 1511 | 1671 | 20 | -0.95 |
| XY20-05-07  | 0.072128 | 0.001684 | 0.002036 | 0.000057 | 0.282254 | 0.000017 | -18.3 | 1.6  | 1.3 | 1448 | 1569 | 25 | -0.94 |
| XY20-05-08c | 0.014554 | 0.000132 | 0.000365 | 0.000006 | 0.282158 | 0.000016 | -21.7 | 4.9  | 1.2 | 1516 | 1608 | 23 | -0.99 |
| XY20-05-09c | 0.082453 | 0.001147 | 0.002642 | 0.000054 | 0.282201 | 0.000018 | -20.2 | 1.6  | 1.2 | 1549 | 1659 | 26 | -0.92 |
| XY20-05-10  | 0.019002 | 0.000617 | 0.000483 | 0.000024 | 0.282137 | 0.000018 | -22.5 | -2.4 | 1.3 | 1549 | 1739 | 25 | -0.99 |
| XY20-05-11c | 0.043751 | 0.000319 | 0.001132 | 0.000007 | 0.282177 | 0.000015 | -21.0 | 1.1  | 1.2 | 1520 | 1656 | 21 | -0.97 |
| XY20-05-12c | 0.035083 | 0.000956 | 0.000947 | 0.000029 | 0.282091 | 0.000015 | -24.1 | 2.7  | 1.3 | 1633 | 1744 | 21 | -0.97 |
| XY20-05-13  | 0.006326 | 0.000498 | 0.000153 | 0.000013 | 0.282119 | 0.000015 | -23.1 | -3.0 | 1.2 | 1561 | 1764 | 20 | -1.00 |
| XY20-05-14c | 0.073721 | 0.000867 | 0.002007 | 0.000037 | 0.282242 | 0.000018 | -18.7 | 2.2  | 1.2 | 1464 | 1577 | 25 | -0.94 |
| XY20-05-15  | 0.049673 | 0.001105 | 0.001247 | 0.000019 | 0.282195 | 0.000014 | -20.4 | -0.7 | 1.2 | 1500 | 1658 | 19 | -0.96 |
| XY20-05-16  | 0.051761 | 0.000594 | 0.001358 | 0.000018 | 0.282176 | 0.000017 | -21.1 | -1.6 | 1.2 | 1531 | 1698 | 23 | -0.96 |
| XY20-05-17c | 0.014950 | 0.000459 | 0.000386 | 0.000013 | 0.281923 | 0.000019 | -30.0 | -6.6 | 1.3 | 1838 | 2072 | 25 | -0.99 |
| XY20-05-18c | 0.027115 | 0.000083 | 0.000753 | 0.000003 | 0.282041 | 0.000015 | -25.9 | -0.1 | 1.3 | 1693 | 1840 | 21 | -0.98 |
| XY20-05-19c | 0.084814 | 0.002968 | 0.002560 | 0.000119 | 0.282200 | 0.000017 | -20.2 | 2.5  | 1.2 | 1547 | 1647 | 24 | -0.92 |
| XY20-05-20  | 0.046236 | 0.001402 | 0.001195 | 0.000043 | 0.282189 | 0.000014 | -20.6 | -1.2 | 1.2 | 1507 | 1672 | 20 | -0.96 |
| XY20-05-22  | 0.066248 | 0.001240 | 0.001702 | 0.000021 | 0.282164 | 0.000015 | -21.5 | -1.6 | 1.2 | 1562 | 1721 | 21 | -0.95 |
| XY20-05-23c | 0.057569 | 0.001032 | 0.001484 | 0.000018 | 0.282062 | 0.000018 | -25.1 | -2.8 | 1.2 | 1697 | 1867 | 25 | -0.96 |
| XY20-05-24  | 0.053585 | 0.000987 | 0.001366 | 0.000017 | 0.282155 | 0.000016 | -21.8 | -2.1 | 1.3 | 1560 | 1732 | 22 | -0.96 |
|             |          |          |          |          |          |          |       |      |     |      |      |    |       |
| XY20-07-08  | 0.068505 | 0.000867 | 0.001854 | 0.000027 | 0.282191 | 0.000015 | -20.6 | -0.7 | 1.3 | 1531 | 1679 | 22 | -0.94 |
| XY20-07-10  | 0.079827 | 0.001904 | 0.002213 | 0.000074 | 0.282251 | 0.000019 | -18.4 | 1.3  | 1.3 | 1458 | 1580 | 27 | -0.93 |
| XY20-07-12  | 0.011502 | 0.000865 | 0.000301 | 0.000027 | 0.282042 | 0.000016 | -25.8 | -4.9 | 1.3 | 1672 | 1893 | 22 | -0.99 |
| XY20-07-14c | 0.047504 | 0.001658 | 0.001319 | 0.000053 | 0.282244 | 0.000019 | -18.7 | 1.6  | 1.3 | 1434 | 1565 | 26 | -0.96 |
| XY20-07-18  | 0.062284 | 0.000274 | 0.001654 | 0.000013 | 0.282205 | 0.000015 | -20.1 | -0.3 | 1.2 | 1502 | 1649 | 21 | -0.95 |
| XY20-07-19  | 0.060995 | 0.002097 | 0.001555 | 0.000044 | 0.282190 | 0.000021 | -20.6 | -0.6 | 1.2 | 1519 | 1670 | 30 | -0.95 |
| XY20-07-21  | 0.079117 | 0.001175 | 0.002019 | 0.000024 | 0.282234 | 0.000017 | -19.0 | 0.8  | 1.3 | 1475 | 1605 | 25 | -0.94 |
| XY20-07-23  | 0.027533 | 0.001335 | 0.000738 | 0.000038 | 0.282141 | 0.000019 | -22.3 | -1.3 | 1.3 | 1555 | 1726 | 26 | -0.98 |
| XY20-07-24  | 0.053471 | 0.000521 | 0.001426 | 0.000018 | 0.282199 | 0.000015 | -20.3 | -0.1 | 1.3 | 1501 | 1649 | 22 | -0.96 |

**\*Postfix c denotes inherited zircon domain; the spots without postfix for the Magmatic zircon.  $T_{DM2}$  represents Hf crustal model ages, following calculation equations described by [84]. The parameters used in the calculations are: mean continent crust ( $^{176}\text{Lu}/^{177}\text{Hf}$ )<sub>cc</sub>=0.015; Chondrite Uniform Reservoir ( $^{176}\text{Lu}/^{177}\text{Hf}$ )<sub>CHUR</sub>=0.0332, ( $^{176}\text{Hf}/^{177}\text{Hf}$ )<sub>CHUR</sub>=0.282772, and depleted mantle ( $^{176}\text{Lu}/^{177}\text{Hf}$ )<sub>DM</sub>=0.0384, ( $^{176}\text{Hf}/^{177}\text{Hf}$ )<sub>DM</sub>=0.28325;  $\lambda_{\text{Lu}}$ = $1.867 \times 10^{-11}$ /year.**
